# Supplementary material for: The Pan-Sirtuin Inhibitor MC2494 Regulates Mitochondrial Function in a Leukemia Cell Line
Source: PubMed Central journal article supplement (PMC7255067; doi:10.3389/fonc.2020.00820), 2020-05-21
Supplement: Image_1.pdf [file Image_1.pdf]

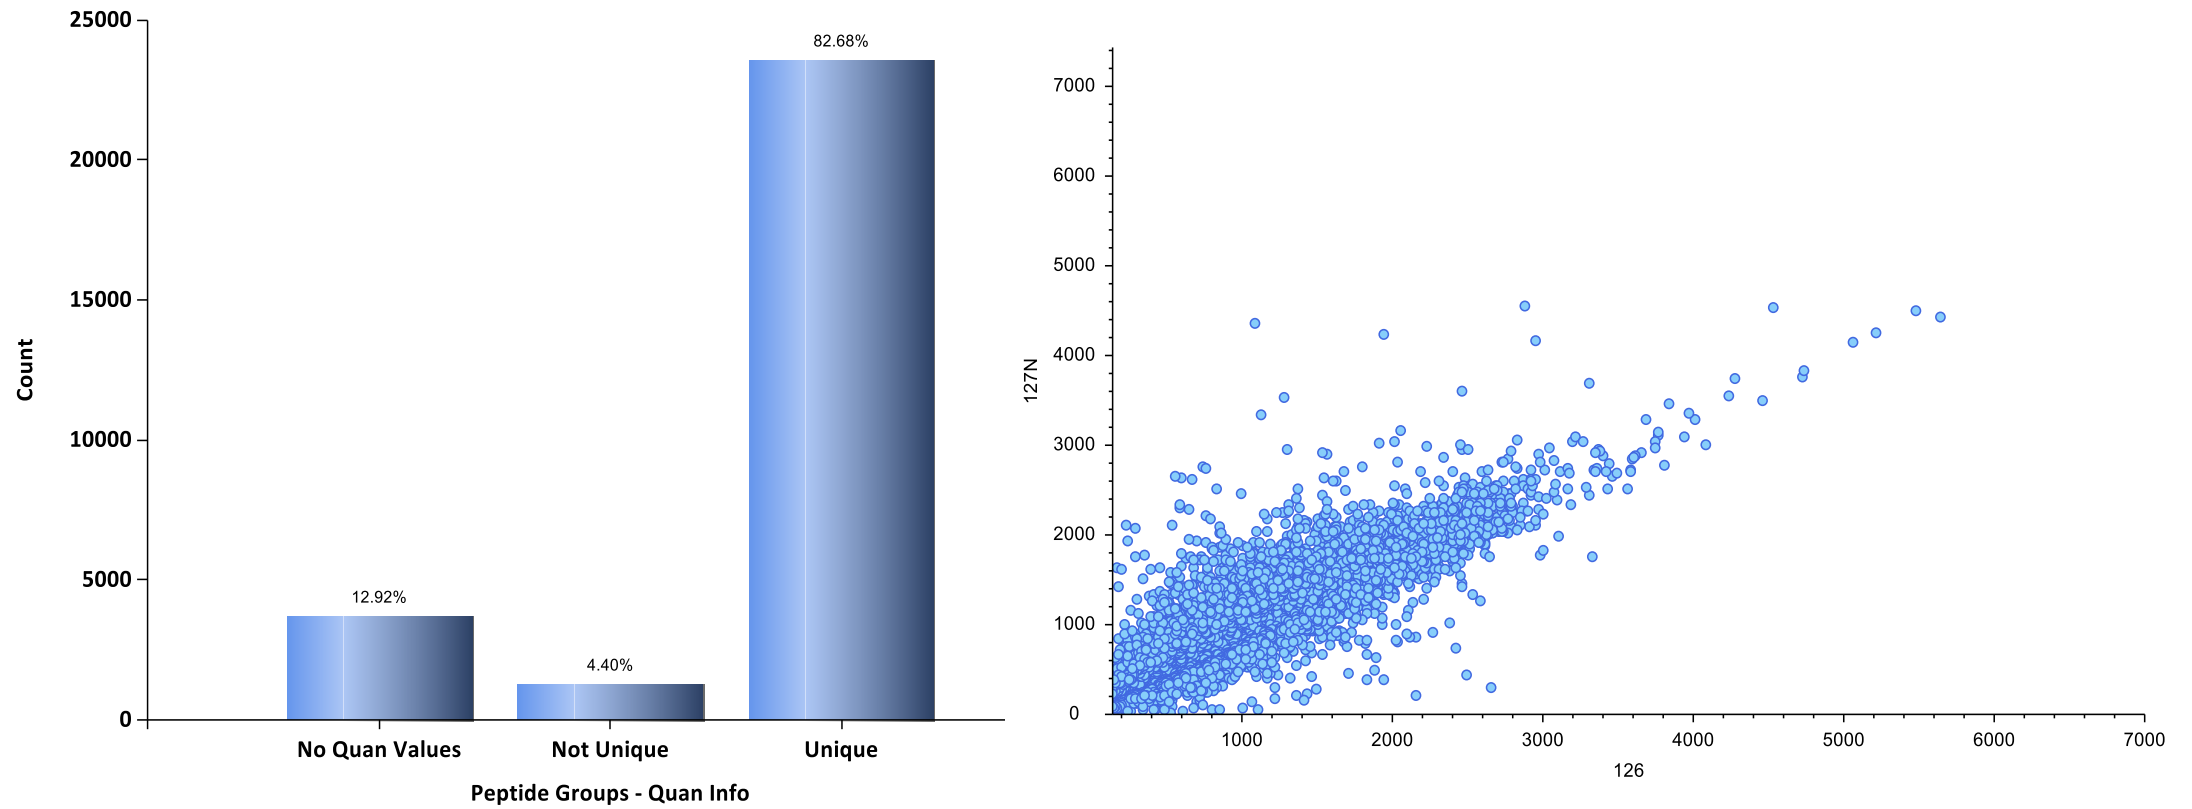

**Supplementary figure 1.** A) Peptide group distribution used for protein quantification. A total of 82.7% of unique peptides was used for protein quantification, guaranteeing the high efficiency of peptide labeling. B) Scatter plot of peptide intensities in untreated (127N TMT tag) versus MC2494-treated (126 TMT tag) U937 cells.
