# Supplementary material for: The Pan-Sirtuin Inhibitor MC2494 Regulates Mitochondrial Function in a Leukemia Cell Line
Source: PubMed Central journal article supplement (PMC7255067; doi:10.3389/fonc.2020.00820), 2020-05-21
Supplement: Image_3.pdf [file Image_3.pdf]

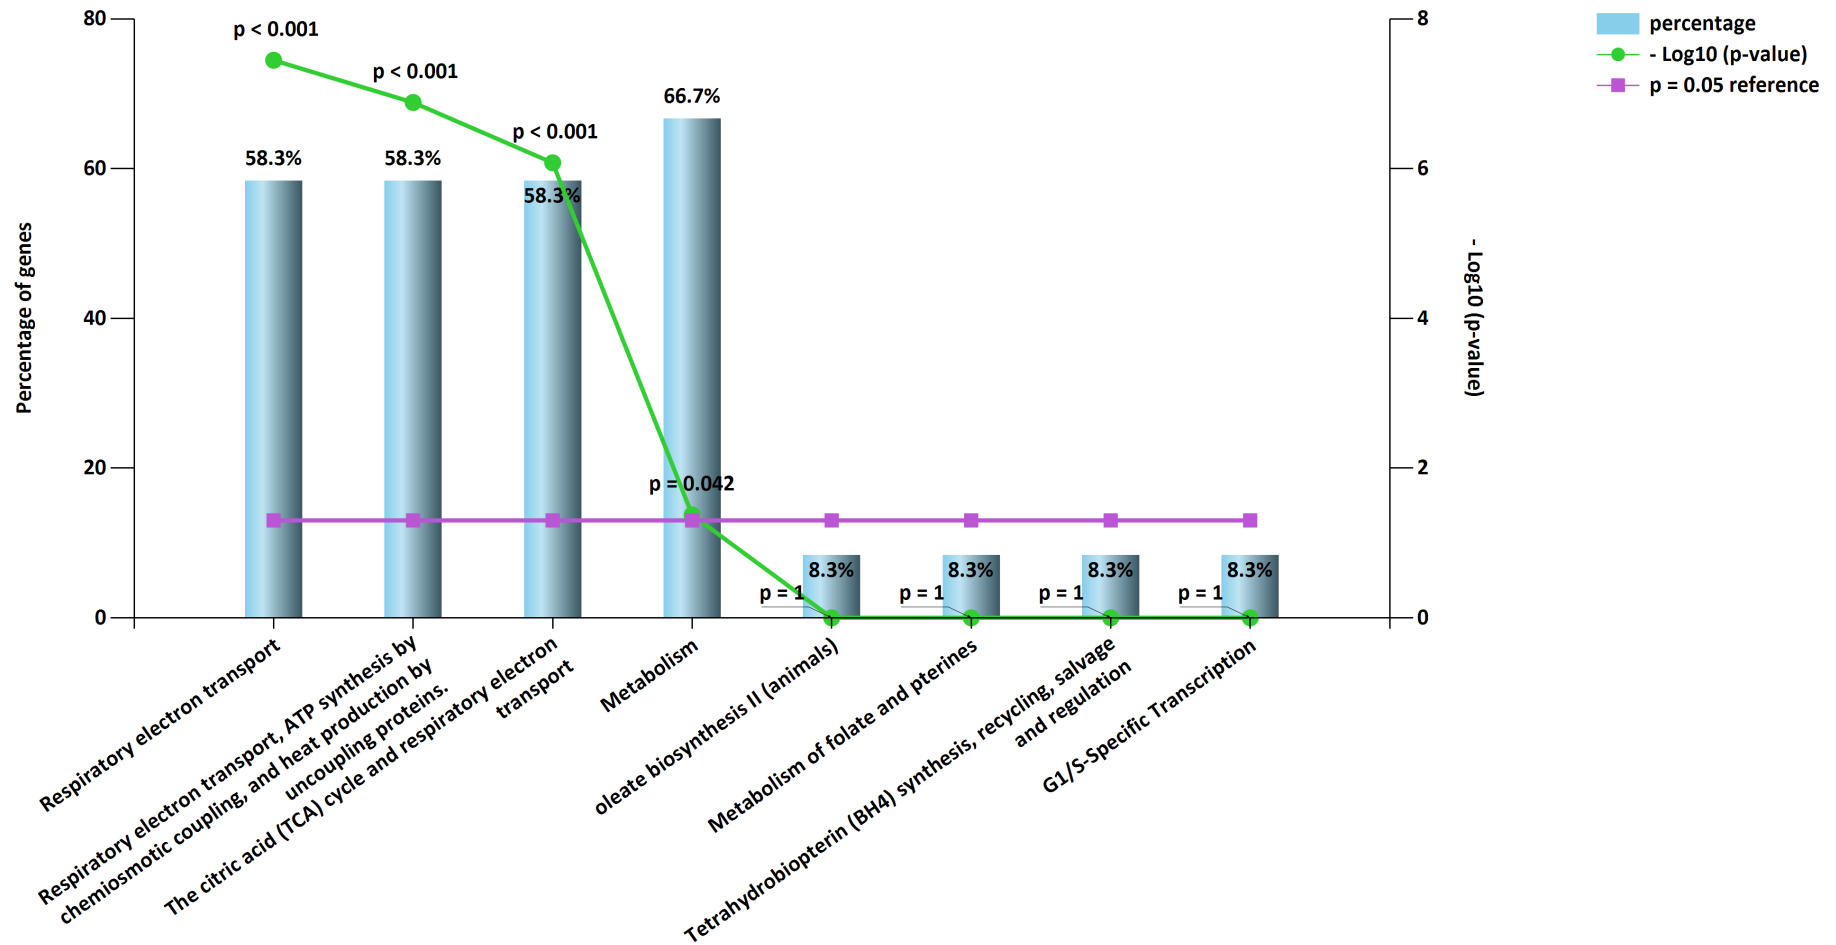

**Supplementary figure 3.** Functional enrichment based on the biological process GO category of differentially expressed mitochondrial proteins identified by TMT-based quantitative proteomic analysis of MC2494-treated *versus* untreated U937 cells. Enrichment analysis was performed using FunRich software. Percentages of mapped proteins/genes and p-values based on a hypergeometric test are reported in bar graphs along with reference p-value ( $p = 0.05$ ).
