# Supplementary material for: The Pan-Sirtuin Inhibitor MC2494 Regulates Mitochondrial Function in a Leukemia Cell Line
Source: Front Oncol. 2020 May 21;10:820. doi: 10.3389/fonc.2020.00820 (PMC7255067; doi:10.3389/fonc.2020.00820)
Supplement: Supplementary file 6 [file Table_1.XLSX]

## Sheet: MS_MS identification details
Table S1. Proteomic analysis by high-resolution MS/MS of MC2494-treated versus untreated U937 human myeloid leukaemia cell line
Gene name	Accession	Description	U937 treated/untreated Abundance ratio	Exp. q-value	Sum PEP Score	Coverage	# Peptides	# PSMs	# Unique Peptides	# Protein Groups	# AAs	MW [kDa]	calc. pI	Found in Sample: [S1] F1: 126, Sample	Found in Sample: [S2] F2: 126, Sample	Found in Sample: [S3] F3: 126, Sample	Found in Sample: [S4] F1: 127N, Sample	Found in Sample: [S5] F2: 127N, Sample	Found in Sample: [S6] F3: 127N, Sample	Modifications	Abundances (Grouped): 126	Abundances (Grouped): 127N	Abundances (Grouped) Standard Error [%]: 126	Abundances (Grouped) Standard Error [%]: 127N	Abundances (Scaled): F1: 126, Sample	Abundances (Scaled): F2: 126, Sample	Abundances (Scaled): F3: 126, Sample	Abundances (Scaled): F1: 127N, Sample	Abundances (Scaled): F2: 127N, Sample	Abundances (Scaled): F3: 127N, Sample	emPAI	# Razor Peptides	Score Sequest HT	# Peptides Sequest HT
HSPA1A	P0DMV8	heat shock 70 kDa protein 1A [OS=Homo sapiens]	1.47	0	234.061	67.5507	34	300	25	1	641	70.009	5.66	High	High	High	High	High	High		119	81	1.15	1.69	118.2	120.6	118.3	81.8	79.4	81.7	39.296	4	927.647	34
ASS1	P00966	Argininosuccinate synthase [OS=Homo sapiens]	1.334	0	18.4112	12.6214	5	12	5	1	412	46.501	8.02	High	High	High	High	High	High		114.3	85.7	4.07	5.44	109	116.6	117.4	91	83.4	82.6	0.701	0	28.3308	5
ANXA6	P08133-1	annexin A6 [OS=Homo sapiens]	1.221	0	166.002	60.1783	37	140	37	1	673	75.826	5.6	High	High	High	High	High	High		110	90	0.17	0.21	110	109.8	110.2	90	90.2	89.8	7.71	0	409.545	37
BRI3BP	Q8WY22	BRI3-binding protein [OS=Homo sapiens]	1.204	0.00228796	10.9702	16.7331	3	10	2	1	251	27.818	9.44	High	High	High	High	High	High		109.3	90.7	1.84	2.22	108.1	111.6	108.1	91.9	88.4	91.9	0.778	0	39.7743	3
NNT	Q13423	NAD(P) transhydrogenase, mitochondrial [OS=Homo sapiens]	1.178	0	92.6484	22.9282	22	65	22	1	1086	113.823	8.09	High	High	High	High	High	High		108.2	91.8	0.49	0.58	108.5	108.5	107.6	91.5	91.5	92.4	2.162	0	174.421	22
ACAT1	P24752	Acetyl-CoA acetyltransferase, mitochondrial [OS=Homo sapiens]	1.173	0	88.6727	39.3443	16	59	16	1	427	45.171	8.85	High	High	High	High	High	High		108	92	0.67	0.79	108.4	107.1	108.4	91.6	92.9	91.6	6.743	0	169.829	16
TSPO	P30536	translocator protein [OS=Homo sapiens]	1.173	0.00445001	6.04643	9.46746	2	6	2	1	169	18.816	9.36	High	High	High	High	High	High		108	92	1.07	1.26	107.3	107.3	109.3	92.7	92.7	90.7	0.778	0	14.2877	2
ABAT	P80404	4-aminobutyrate aminotransferase, mitochondrial [OS=Homo sapiens]	1.16	0	30.0009	20	8	14	8	1	500	56.403	7.96	High	High	High	High	High	High		107.4	92.6	9.03	10.48	118.3	99.6	104.3	81.7	100.4	95.7	0.693	0	35.606	8
SCP2	P22307-1	Non-specific lipid-transfer protein [OS=Homo sapiens]	1.153	0	60.4644	19.7441	12	55	12	1	547	58.956	6.89	High	High	High	High	High	High		107.1	92.9	0.54	0.63	107.2	106.5	107.6	92.8	93.5	92.4	2.268	0	154.801	12
HSPA5	P11021	78 kDa glucose-regulated protein [OS=Homo sapiens]	1.149	0	275.372	59.9388	40	390	37	1	654	72.288	5.16	High	High	High	High	High	High		106.9	93.1	0.55	0.64	106.6	106.6	107.6	93.4	93.4	92.4	62.808	0	1243.9	40
PRDX5	P30044-1	Peroxiredoxin-5, mitochondrial [OS=Homo sapiens]	1.144	0	66.1087	55.1402	8	65	8	1	214	22.073	8.7	High	High	High	High	High	High		106.7	93.3	0.6	0.69	106.3	106.4	107.5	93.7	93.6	92.5	13.251	0	212.455	8
MDH2	P40926	Malate dehydrogenase, mitochondrial [OS=Homo sapiens]	1.142	0	163.165	68.0473	20	253	20	1	338	35.481	8.68	High	High	High	High	High	High		106.6	93.4	0.17	0.2	106.7	106.8	106.4	93.3	93.2	93.6	38.811	0	869.167	20
AK2	P54819	Adenylate kinase 2, mitochondrial [OS=Homo sapiens]	1.137	0	63.5402	61.5063	13	82	13	1	239	26.461	7.81	High	High	High	High	High	High		106.4	93.6	0.25	0.29	106.5	106.7	106.1	93.5	93.3	93.9	9	0	273.029	13
RPS27A	P62979	Ubiquitin-40S ribosomal protein S27a [OS=Homo sapiens]	1.135	0	57.696	62.1795	9	186	2	1	156	17.953	9.64	High	High	High	High	High	High		106.3	93.7	1	1.13	107.3	106.4	105.2	92.7	93.6	94.8	27.48	7	531.791	9
TFAM	Q00059	Transcription factor A, mitochondrial [OS=Homo sapiens]	1.129	0	24.3544	26.8293	8	26	8	1	246	29.078	9.72	High	High	High	High	High	High		106.1	93.9	0.59	0.67	106.1	105.4	106.7	93.9	94.6	93.3	1.818	0	69.8349	8
ABHD10	Q9NUJ1	Mycophenolic acid acyl-glucuronide esterase, mitochondrial [OS=Homo sapiens]	1.125	0	13.7614	16.9935	5	12	5	1	306	33.911	8.57	High	High	High	High	High	High		105.9	94.1	1.46	1.64	106.3	104.2	107.2	93.7	95.8	92.8	0.778	0	20.1171	5
ETHE1	O95571	Persulfide dioxygenase ETHE1, mitochondrial [OS=Homo sapiens]	1.125	0	28.525	24.4094	5	16	5	1	254	27.855	6.83	High	High	High	High	High	High		105.9	94.1	0.8	0.9	106.7	105	106	93.3	95	94	1.738	0	47.6735	5
ECI1	P42126	Enoyl-CoA delta isomerase 1, mitochondrial [OS=Homo sapiens]	1.123	0	15.9525	14.2384	4	12	4	1	302	32.795	8.54	High	High	High	High	High	High		105.8	94.2	1.85	2.07	104.1	105.3	107.9	95.9	94.7	92.1	1.276	0	29.9014	4
VDAC2	P45880-1	Isoform 1 of Voltage-dependent anion-selective channel protein 2 [OS=Homo sapiens]	1.112	0	99.7223	62.1359	14	136	14	1	309	33.351	7.59	High	High	High	High	High	High		105.3	94.7	0.13	0.15	105.2	105.3	105.4	94.8	94.7	94.6	17.33	0	377.59	14
ECH1	Q13011	Delta(3,5)-Delta(2,4)-dienoyl-CoA isomerase, mitochondrial [OS=Homo sapiens]	1.11	0	58.1292	37.8049	11	43	11	1	328	35.793	8	High	High	High	High	High	High		105.2	94.8	1.25	1.39	105	106.7	104.1	95	93.3	95.9	4.337	0	118.543	11
PARP1	P09874	Poly [ADP-ribose] polymerase 1 [OS=Homo sapiens]	1.109	0	260.069	51.6765	51	180	51	1	1014	113.012	8.88	High	High	High	High	High	High		105.2	94.8	1.5	1.66	104.3	104.2	107	95.7	95.8	93	11.915	0	538.402	51
VDAC1	P21796	voltage-dependent anion-selective channel protein 1 [OS=Homo sapiens]	1.109	0	96.0097	66.7845	14	157	13	1	283	30.754	8.54	High	High	High	High	High	High		105.2	94.8	0.63	0.69	104.6	105.9	105	95.4	94.1	95	20.544	1	462.766	14
GATD3B	P30042-1	ES1 protein homolog, mitochondrial [OS=Homo sapiens]	1.106	0	33.7613	33.5821	7	22	7	1	268	28.153	8.27	High	High	High	High	High	High		105	95	4.3	4.76	103	101.9	110.2	97	98.1	89.8	3.642	0	48.1723	7
HEBP2	Q9Y5Z4-1	Heme-binding protein 2 [OS=Homo sapiens]	1.106	0	17.0929	23.9024	4	10	4	1	205	22.861	4.63	High	High	High	High	High	High		105	95	1.29	1.43		104.1	106		95.9	94	2.162	0	21.0579	4
HSPE1	P61604	10 kDa heat shock protein, mitochondrial [OS=Homo sapiens]	1.103	0	52.9693	77.451	10	113	10	1	102	10.925	8.92	High	High	High	High	High	High		104.9	95.1	0.47	0.51	104.5	105.4	104.9	95.5	94.6	95.1	38.811	0	277.198	10
SOD1	P00441	Superoxide dismutase [Cu-Zn] [OS=Homo sapiens]	1.102	0	51.8002	62.987	9	57	9	1	154	15.926	6.13	High	High	High	High	High	High		104.9	95.1	0.2	0.22	104.7	105.1	104.8	95.3	94.9	95.2	25.102	0	156.053	9
PTPN11	Q06124	tyrosine-protein phosphatase non-receptor type 11 [OS=Homo sapiens]	1.102	0	33.3131	13.7353	8	18	8	1	597	68.393	7.3	High	High	High	High	High	High		104.8	95.2	1.42	1.56	106.6	103.9	104	93.4	96.1	96	0.73	0	41.1571	8
DIMT1	Q9UNQ2	Probable dimethyladenosine transferase [OS=Homo sapiens]	1.1	0	23.007	21.7252	6	11	6	1	313	35.214	9.99	High	High	High	High	High	High		104.7	95.3	4.32	4.75	99.6	108	106.6	100.4	92	93.4	1.228	0	23.5385	6
CANX	P27824-2	Isoform 2 of Calnexin [OS=Homo sapiens]	1.095	0	156.809	42.5837	29	226	29	1	627	71.458	4.7	High	High	High	High	High	High		104.5	95.5	0.02	0.02	104.5	104.5	104.5	95.5	95.5	95.5	31.819	0	664.438	29
FIS1	Q9Y3D6	mitochondrial fission 1 protein [OS=Homo sapiens]	1.094	0	21.272	28.2895	4	16	4	1	152	16.927	8.79	High	High	High	High	High	High		104.5	95.5	6.04	6.61	104.6	98.2	110.8	95.4	101.8	89.2	4.623	0	40.9895	4
FH	P07954	fumarate hydratase, mitochondrial [OS=Homo sapiens]	1.094	0	84.2461	37.6471	16	62	16	1	510	54.602	8.76	High	High	High	High	High	High		104.5	95.5	0.3	0.33	104.2	104.9	104.4	95.8	95.1	95.6	3.977	0	194.689	16
PRDX3	P30048	Thioredoxin-dependent peroxide reductase, mitochondrial [OS=Homo sapiens]	1.091	0	44.2174	33.5938	6	41	6	1	256	27.675	7.78	High	High	High	High	High	High		104.4	95.6	1.25	1.36	104	103.3	105.8	96	96.7	94.2	4.179	0	146.948	6
CISD1	Q9NZ45	CDGSH iron-sulfur domain-containing protein 1 [OS=Homo sapiens]	1.089	0.00228796	8.31949	22.2222	2	6	2	1	108	12.191	9.09	High	High	High	High	High	High		104.3	95.7	1.66	1.81	104.6	102.4	105.8	95.4	97.6	94.2	1.154	0	21.9493	2
SLC25A1	P53007	Tricarboxylate transport protein, mitochondrial [OS=Homo sapiens]	1.089	0	35.0992	22.8296	7	26	7	1	311	33.991	9.89	High	High	High	High	High	High		104.3	95.7	0.88	0.96	103.5	104.1	105.3	96.5	95.9	94.7	2.162	0	74.7225	7
SLC25A3	Q00325-1	Phosphate carrier protein, mitochondrial [OS=Homo sapiens]	1.089	0	45.6753	29.0055	10	52	10	1	362	40.069	9.38	High	High	High	High	High	High		104.3	95.7	0.32	0.34	104.3	104.6	103.9	95.7	95.4	96.1	5.449	0	117.899	10
TOMM5	Q8N4H5-2	Isoform 2 of Mitochondrial import receptor subunit TOM5 homolog [OS=Homo sapiens]	1.089	0.00354884	7.39757	25	3	9	3	1	92	10.026	6.51	High	High	High	High	High	High		104.3	95.7	3.72	4.05	103	108.6	101.2	97	91.4	98.8	2.728	0	21.1057	3
ACBD3	Q9H3P7	Golgi resident protein GCP60 [OS=Homo sapiens]	1.088	0	20.9784	11.7424	4	9	4	1	528	60.556	5.06	High	High	High	High	High	High		104.2	95.8	2.44	2.66	102	103.7	107	98	96.3	93	0.492	0	37.5674	4
MRPS25	P82663	28S ribosomal protein S25, mitochondrial [OS=Homo sapiens]	1.088	0.00228796	9.31422	21.3873	3	6	3	1	173	20.103	8.82	High	High	High	High	High	High		104.2	95.8	3.13	3.41	101.4	107.8	103.5	98.6	92.2	96.5	0.874	0	20.445	3
GLUD1	P00367	Glutamate dehydrogenase 1, mitochondrial [OS=Homo sapiens]	1.087	0	94.9151	35.1254	18	67	18	1	558	61.359	7.8	High	High	High	High	High	High		104.2	95.8	2.78	3.03	107.5	102.5	102.5	92.5	97.5	97.5	4.275	0	199.443	18
PYCARD	Q9ULZ3	apoptosis-associated speck-like protein containing a CARD [OS=Homo sapiens]	1.085	0	38.0722	38.9744	7	24	7	1	195	21.613	6.34	High	High	High	High	High	High		104.1	95.9	1.14	1.23	104.1	102.9	105.3	95.9	97.1	94.7	5.813	0	70.9586	7
UBA1	P22314	Ubiquitin-like modifier-activating enzyme 1 [OS=Homo sapiens]	1.082	0	233.121	43.0057	35	237	35	1	1058	117.774	5.76	High	High	High	High	High	High		103.9	96.1	0.26	0.29	103.9	103.7	104.2	96.1	96.3	95.8	8.261	0	740.31	35
AK3	Q9UIJ7-1	GTP:AMP phosphotransferase AK3, mitochondrial [OS=Homo sapiens]	1.082	0	46.5968	51.1013	11	28	11	1	227	25.55	9.16	High	High	High	High	High	High		103.9	96.1	1.31	1.41	105.3	104	102.6	94.7	96	97.4	4.456	0	62.1399	11
NAXE	Q8NCW5	NAD(P)H-hydrate epimerase [OS=Homo sapiens]	1.079	0	21.3582	31.9444	7	16	7	1	288	31.654	7.66	High	High	High	High	High	High		103.8	96.2	0.52	0.56	103.4	103.6	104.4	96.6	96.4	95.6	1.783	0	33.6104	7
HSP90AB1	P08238	Heat shock protein HSP 90-beta [OS=Homo sapiens]	1.078	0	415.746	65.884	51	1006	30	1	724	83.212	5.03	High	High	High	High	High	High		103.7	96.3	0.8	0.86	102.8	104.4	104	97.2	95.6	96	323.809	1	2880.65	51
HADH	Q16836-2	Isoform 2 of Hydroxyacyl-coenzyme A dehydrogenase, mitochondrial [OS=Homo sapiens]	1.078	0	30.1482	23.0769	9	24	9	1	390	42.113	9.26	High	High	High	High	High	High		103.8	96.2	0.61	0.66	104.5	103.4	103.4	95.5	96.6	96.6	1.61	0	53.2715	9
MGST1	P10620	Microsomal glutathione S-transferase 1 [OS=Homo sapiens]	1.077	0	20.6309	16.7742	3	14	3	1	155	17.587	9.39	High	High	High	High	High	High		103.7	96.3	2.5	2.69	101.4	106.5	103.2	98.6	93.5	96.8	4.179	0	43.9299	3
HSPD1	P10809	60 kDa heat shock protein, mitochondrial [OS=Homo sapiens]	1.075	0	303.056	79.0576	36	437	36	1	573	61.016	5.87	High	High	High	High	High	High		103.6	96.4	0.13	0.14	103.8	103.6	103.5	96.2	96.4	96.5	92.804	0	1361.11	36
GARS1	P41250	Glycine--tRNA ligase [OS=Homo sapiens]	1.074	0	109.95	40.0541	28	100	28	1	739	83.113	7.03	High	High	High	High	High	High		103.6	96.4	1.05	1.13	102.9	104.8	103.1	97.1	95.2	96.9	4.08	0	246.568	28
CAT	P04040	catalase [OS=Homo sapiens]	1.073	0	113.607	42.6945	20	108	20	1	527	59.719	7.39	High	High	High	High	High	High		103.5	96.5	0.17	0.18	103.3	103.7	103.6	96.7	96.3	96.4	7.697	0	265.556	20
PHB	P35232	Prohibitin [OS=Homo sapiens]	1.073	0	87.4164	54.4118	14	105	14	1	272	29.786	5.76	High	High	High	High	High	High		103.5	96.5	1.7	1.83	104.9	104	101.5	95.1	96	98.5	17.957	0	291.137	14
DNAJC5	Q9H3Z4	DnaJ homolog subfamily C member 5 [OS=Homo sapiens]	1.072	0	13.5023	27.2727	3	6	3	1	198	22.134	5.07	High	High	High	High	High	High		103.5	96.5	2.88	3.09	106.7	100.8	103	93.3	99.2	97	2.162	0	17.8127	3
GCSH	P23434	Glycine cleavage system H protein, mitochondrial [OS=Homo sapiens]	1.072	0	13.8186	17.341	2	13	2	1	173	18.873	4.88	High	High	High	High	High	High		103.5	96.5	0.12	0.13	103.6	103.4	103.4	96.4	96.6	96.6	1.371	0	43.3324	2
NIPSNAP2	O75323-1	Protein NipSnap homolog 2 [OS=Homo sapiens]	1.072	0	24.249	21.3287	7	19	4	1	286	33.721	9.36	High	High	High	High	High	High		103.5	96.5	1.94	2.08	104.5	101.2	104.8	95.5	98.8	95.2	1.637	3	40.2589	7
RIDA	P52758	Ribonuclease UK114 [OS=Homo sapiens]	1.066	0	12.3199	15.3285	2	7	2	1	137	14.485	8.68	High	High	High	High	High	High		103.2	96.8	1.29	1.37	102.4	102.5	104.7	97.6	97.5	95.3	0.995	0	20.8802	2
SHMT2	P34897-1	Serine hydroxymethyltransferase, mitochondrial [OS=Homo sapiens]	1.066	0	112.19	51.5873	23	107	21	1	504	55.958	8.53	High	High	High	High	High	High		103.2	96.8	0.87	0.93	102.5	104.2	102.8	97.5	95.8	97.2	7.733	2	285.916	23
PPA2	Q9H2U2-2	Isoform 2 of Inorganic pyrophosphatase 2, mitochondrial [OS=Homo sapiens]	1.065	0	45.0155	32.6648	10	49	9	1	349	39.613	6.92	High	High	High	High	High	High		103.1	96.9	2.33	2.48	101.1	102.5	105.8	98.9	97.5	94.2	2.162	0	135.535	10
ATP5IF1	Q9UII2-1	ATPase inhibitor, mitochondrial [OS=Homo sapiens]	1.065	0	16.4273	30.1887	4	14	4	1	106	12.241	9.35	High	High	High	High	High	High		103.1	96.9	2.1	2.24	101.1	102.9	105.4	98.9	97.1	94.6	4.623	0	38.5762	4
HIBADH	P31937	3-hydroxyisobutyrate dehydrogenase, mitochondrial [OS=Homo sapiens]	1.063	0	22.414	19.6429	4	10	4	1	336	35.306	8.13	High	High	High	High	High	High		103.1	96.9	1.47	1.56	104.3	101.4	103.5	95.7	98.6	96.5	0.968	0	34.1225	4
GSTP1	P09211	Glutathione S-transferase P [OS=Homo sapiens]	1.063	0	58.6779	55.2381	8	110	8	1	210	23.341	5.64	High	High	High	High	High	High		103.1	96.9	0.92	0.98	103.1	102.1	104	96.9	97.9	96	13.678	0	331.521	8
AIFM1	O95831-1	Apoptosis-inducing factor 1, mitochondrial [OS=Homo sapiens]	1.063	0	108.032	34.2577	18	83	18	1	613	66.859	8.95	High	High	High	High	High	High		103.1	96.9	0.31	0.33	103	103.4	102.8	97	96.6	97.2	6.565	0	231.284	18
ME2	P23368-1	NAD-dependent malic enzyme, mitochondrial [OS=Homo sapiens]	1.062	0	43.34	21.5753	11	19	11	1	584	65.402	7.61	High	High	High	High	High	High		103	97	0.66	0.7	102.7	102.5	103.8	97.3	97.5	96.2	1.31	0	50.2287	11
NME1	P15531-2	Isoform 2 of Nucleoside diphosphate kinase A [OS=Homo sapiens]	1.061	0	66.9682	49.7175	9	125	1	1	177	19.641	5.58	High	High	High	High	High	High		102.9	97.1	7.86	8.33	108.7		97.2	91.3		102.8	42.288	0	340.637	9
SLC25A11	Q02978	Mitochondrial 2-oxoglutarate/malate carrier protein [OS=Homo sapiens]	1.058	0	19.789	16.5605	5	10	5	1	314	34.04	9.91	High	High	High	High	High	High		102.8	97.2	0.8	0.85	102.3	103.8	102.4	97.7	96.2	97.6	0.931	0	30.285	5
PARK7	Q99497	Protein deglycase DJ-1 [OS=Homo sapiens]	1.057	0	83.0352	69.8413	13	95	13	1	189	19.878	6.79	High	High	High	High	High	High		102.8	97.2	0.76	0.8	103.4	101.9	103.1	96.6	98.1	96.9	48.239	0	306.696	13
DCPS	Q96C86	M7GpppX diphosphatase [OS=Homo sapiens]	1.057	0	18.9223	21.0682	5	10	5	1	337	38.585	6.38	High	High	High	High	High	High		102.8	97.2	2.19	2.32	102.7	105.1	100.5	97.3	94.9	99.5	0.778	0	31.7253	5
SUCLG2	Q96I99-1	Succinyl-CoA ligase [GDP-forming] subunit beta, mitochondrial [OS=Homo sapiens]	1.057	0	62.2742	33.3333	11	31	11	1	432	46.481	6.39	High	High	High	High	High	High		102.8	97.2	0.82	0.87	103.7	102.1	102.6	96.3	97.9	97.4	2.282	0	90.7992	11
LONP1	P36776	Lon protease homolog, mitochondrial [OS=Homo sapiens]	1.056	0	71.9791	21.4807	18	46	18	1	959	106.422	6.39	High	High	High	High	High	High		102.7	97.3	0.87	0.92	102.9	101.7	103.5	97.1	98.3	96.5	1.409	0	129.874	18
GLOD4	Q9HC38-2	Isoform 2 of Glyoxalase domain-containing protein 4 [OS=Homo sapiens]	1.054	0	62.9974	51.0067	15	50	15	1	298	33.212	5.6	High	High	High	High	High	High		102.6	97.4	1.01	1.06	101.6	103.6	102.6	98.4	96.4	97.4	7.031	0	134.157	15
DLAT	P10515	Dihydrolipoyllysine-residue acetyltransferase component of pyruvate dehydrogenase complex, mitochondrial [OS=Homo sapiens]	1.053	0	45.2356	19.9382	10	42	10	1	647	68.953	7.84	High	High	High	High	High	High		102.6	97.4	0.37	0.39	102.4	103	102.3	97.6	97	97.7	1.848	0	117.897	10
GOT2	P00505	Aspartate aminotransferase, mitochondrial [OS=Homo sapiens]	1.053	0	87.2443	41.1628	18	75	18	1	430	47.487	9.01	High	High	High	High	High	High		102.6	97.4	0.77	0.81	102.1	102.2	103.5	97.9	97.8	96.5	7.532	0	212.634	18
GPD2	P43304	Glycerol-3-phosphate dehydrogenase, mitochondrial [OS=Homo sapiens]	1.052	0	65.5837	23.5213	17	47	17	1	727	80.802	7.69	High	High	High	High	High	High		102.5	97.5	1.39	1.46	101.1	102.5	104	98.9	97.5	96	1.512	0	125.108	17
AGK	Q53H12	Acylglycerol kinase, mitochondrial [OS=Homo sapiens]	1.051	0	17.668	10.4265	4	12	4	1	422	47.107	8.09	High	High	High	High	High	High		102.5	97.5	0.75	0.79	102.2	103.4	101.9	97.8	96.6	98.1	0.616	0	26.108	4
ATP5PO	P48047	ATP synthase subunit O, mitochondrial [OS=Homo sapiens]	1.051	0	42.8727	38.9671	7	35	7	1	213	23.263	9.96	High	High	High	High	High	High		102.5	97.5	1.18	1.24	101.2	102.9	103.5	98.8	97.1	96.5	5.105	0	117.894	7
NADK2	Q4G0N4	NAD kinase 2, mitochondrial [OS=Homo sapiens]	1.051	0	13.5926	10.4072	4	6	4	1	442	49.402	8.18	High	Not Found	High	High	Not Found	High		102.5	97.5	0.01	0.01	102.5		102.5	97.5		97.5	0.403	0	10.1182	4
SSBP1	Q04837	Single-stranded DNA-binding protein, mitochondrial [OS=Homo sapiens]	1.051	0	37.8444	55.4054	7	42	7	1	148	17.249	9.6	High	High	High	High	High	High		102.5	97.5	2	2.1	102.7	104.4	100.3	97.3	95.6	99.7	7.111	0	137.227	7
PFDN2	Q9UHV9	Prefoldin subunit 2 [OS=Homo sapiens]	1.05	0	16.7439	33.1169	5	13	5	1	154	16.638	6.58	High	High	High	High	High	High		102.4	97.6	1.01	1.06	101.3	103.3	102.7	98.7	96.7	97.3	1.61	0	33.9928	5
CAPN1	P07384	Calpain-1 catalytic subunit [OS=Homo sapiens]	1.05	0	75.5436	27.1709	19	60	19	1	714	81.838	5.67	High	High	High	High	High	High		102.4	97.6	0.87	0.92	103.4	102.3	101.6	96.6	97.7	98.4	2.34	0	171.5	19
YWHAQ	P27348	14-3-3 protein theta [OS=Homo sapiens]	1.049	0	143.105	74.2857	19	191	13	1	245	27.747	4.78	High	High	High	High	High	High		102.4	97.6	0.53	0.56	102.5	102.9	101.8	97.5	97.1	98.2	112.646	3	597.678	19
NCBP1	Q09161	Nuclear cap-binding protein subunit 1 [OS=Homo sapiens]	1.048	0	42.896	17.0886	9	20	9	1	790	91.781	6.43	High	High	High	High	High	High		102.4	97.6	1.48	1.56	101.4	101.6	104.1	98.6	98.4	95.9	0.855	0	43.0803	9
CISD2	Q8N5K1	CDGSH iron-sulfur domain-containing protein 2 [OS=Homo sapiens]	1.048	0	12.827	25.9259	4	7	4	1	135	15.268	9.61	High	High	High	High	High	High		102.3	97.7	0.32	0.33	102.4	102	102.6	97.6	98	97.4	1.783	0	22.7403	4
TOMM70	O94826	Mitochondrial import receptor subunit TOM70 [OS=Homo sapiens]	1.048	0	88.2056	33.7171	20	65	20	1	608	67.412	7.12	High	High	High	High	High	High		102.3	97.7	1.5	1.57	100.6	103.6	102.8	99.4	96.4	97.2	4.712	0	180.467	20
YWHAG	P61981	14-3-3 protein gamma [OS=Homo sapiens]	1.047	0	101.376	65.1822	14	162	9	1	247	28.285	4.89	High	High	High	High	High	High		102.3	97.7	0.78	0.82	101.5	103.1	102.4	98.5	96.9	97.6	34.938	2	495.609	14
MTCH1	Q9NZJ7	Mitochondrial carrier homolog 1 [OS=Homo sapiens]	1.047	0.00228796	8.34701	8.74036	3	6	3	1	389	41.517	9.32	High	High	High	High	High	High		102.3	97.7	1.3	1.36	101	103.6	102.3	99	96.4	97.7	0.413	0	10.7861	3
VAT1	Q99536	Synaptic vesicle membrane protein VAT-1 homolog [OS=Homo sapiens]	1.046	0	30.4093	19.3384	6	14	6	1	393	41.893	6.29	High	High	High	High	High	High		102.3	97.7	2.32	2.42	105	100.8	101	95	99.2	99	1.637	0	37.7173	6
ECI2	O75521	Enoyl-CoA delta isomerase 2, mitochondrial [OS=Homo sapiens]	1.046	0.00228796	11.1446	8.88325	3	6	3	1	394	43.557	9	High	High	High	High	High	High		102.2	97.8	2.99	3.12	105.7	100.9	100.1	94.3	99.1	99.9	0.389	0	14.1608	3
ACSL4	O60488-1	Long-chain-fatty-acid--CoA ligase 4 [OS=Homo sapiens]	1.046	0	40.1367	21.8003	13	39	11	1	711	79.137	8.38	High	High	High	High	High	High		102.3	97.7	1	1.05	101.1	102.9	102.8	98.9	97.1	97.2	1.239	2	88.7205	13
BCL2L2	Q92843-2	Isoform 3 of Bcl-2-like protein 2 [OS=Homo sapiens]	1.046	0	24.7085	17.4174	5	20	5	1	333	37.147	8.13	High	High	High	High	High	High		102.2	97.8	0.99	1.04	101.8	101.5	103.4	98.2	98.5	96.6	1.404	0	60.4976	5
BCAT2	O15382	Branched-chain-amino-acid aminotransferase, mitochondrial [OS=Homo sapiens]	1.045	0	21.9669	18.8776	6	11	6	1	392	44.259	8.65	High	High	High	High	High	High		102.2	97.8	1.71	1.78	101.3	104.2	101	98.7	95.8	99	0.874	0	36.2697	6
CYB5R3	P00387-3	Isoform 3 of NADH-cytochrome b5 reductase 3 [OS=Homo sapiens]	1.045	0	29.5814	21.8563	5	21	5	1	334	38.202	6.9	High	High	High	High	High	High		102.2	97.8	1.21	1.26	102.5	103.3	100.8	97.5	96.7	99.2	1.512	0	59.2067	5
ACAT2	Q9BWD1-2	Isoform 2 of Acetyl-CoA acetyltransferase, cytosolic [OS=Homo sapiens]	1.045	0	35.6592	25.1174	7	19	7	1	426	44.614	8.46	High	High	High	High	High	High		102.2	97.8	1.59	1.66	101.7	100.9	104	98.3	99.1	96	1.371	0	58.8316	7
MTHFS	P49914	5-formyltetrahydrofolate cyclo-ligase [OS=Homo sapiens]	1.044	0.00993292	4.17346	12.8079	2	2	2	1	203	23.241	7.88	High	High	Not Found	High	High	Not Found		102.1	97.9	2.19	2.29	103.7	100.6		96.3	99.4		0.425	0	3.62196	2
TOMM22	Q9NS69	Mitochondrial import receptor subunit TOM22 homolog [OS=Homo sapiens]	1.042	0	30.2746	50.7042	4	10	4	1	142	15.512	4.34	High	High	High	High	High	High		102.1	97.9	1.89	1.97	102.1	104	100.2	97.9	96	99.8	9	0	28.8442	4
ACAA2	P42765	3-ketoacyl-CoA thiolase, mitochondrial [OS=Homo sapiens]	1.042	0	57.1538	41.3098	10	41	10	1	397	41.898	8.09	High	High	High	High	High	High		102.1	97.9	0.53	0.55	102.6	102	101.6	97.4	98	98.4	3.062	0	129.633	10
HINT2	Q9BX68	Histidine triad nucleotide-binding protein 2, mitochondrial [OS=Homo sapiens]	1.041	0	18.0322	29.4479	3	13	3	1	163	17.151	9.16	High	High	High	High	High	High		102	98	3.91	4.07	97.5	103.4	105.2	102.5	96.6	94.8	1.31	0	34.5997	3
AGPS	O00116	Alkyldihydroxyacetonephosphate synthase, peroxisomal [OS=Homo sapiens]	1.041	0	26.432	15.3495	6	16	6	1	658	72.866	7.34	High	High	High	High	High	High		102	98	1.23	1.28	102	103.3	100.7	98	96.7	99.3	0.512	0	42.8858	6
PNKP	Q96T60	Bifunctional polynucleotide phosphatase/kinase [OS=Homo sapiens]	1.041	0.00413097	6.89585	6.71785	3	3	3	1	521	57.04	8.46	High	Not Found	High	High	Not Found	High		102	98	5.52	5.74	98		106	102		94	0.225	0	6.7895	3
MAPK14	Q16539	Mitogen-activated protein kinase 14 [OS=Homo sapiens]	1.039	0	12.9346	13.6111	4	7	4	1	360	41.267	5.78	High	High	High	High	High	High		101.9	98.1	1.55	1.61	100.6	103.7	101.4	99.4	96.3	98.6	0.551	0	23.3757	4
ADH5	P11766	alcohol dehydrogenase class-3 [OS=Homo sapiens]	1.039	0	41.5931	33.1551	10	31	10	1	374	39.698	7.49	High	High	High	High	High	High		101.9	98.1	1.56	1.62	101.7	100.4	103.6	98.3	99.6	96.4	2.728	0	88.1232	10
ACOT13	Q9NPJ3-1	Acyl-coenzyme A thioesterase 13 [OS=Homo sapiens]	1.039	0	15.209	15.7143	2	11	2	1	140	14.951	9.14	High	High	High	High	High	High		101.9	98.1	1.97	2.04	101	104.2	100.6	99	95.8	99.4	2.162	0	37.2056	2
CD3EAP	O15446-2	Isoform 2 of DNA-directed RNA polymerase I subunit RPA34 [OS=Homo sapiens]	1.039	0	23.2077	23.6328	6	10	6	1	512	55.137	8.37	High	High	High	High	High	High		101.9	98.1	3	3.11	102.2	98.7	104.8	97.8	101.3	95.2	0.995	0	26.7689	6
PKM	P14618-2	Isoform M1 of Pyruvate kinase PKM [OS=Homo sapiens]	1.039	0	283.396	65.3484	37	704	2	1	531	58.025	7.71	High	High	High	High	High	High		101.9	98.1	0.42	0.44	101.6	102.2		98.4	97.8		77.476	0	2108.05	37
APEX1	P27695	DNA-(apurinic or apyrimidinic site) lyase [OS=Homo sapiens]	1.038	0	80.0938	47.4843	13	50	13	1	318	35.532	8.12	High	High	High	High	High	High		101.9	98.1	1.5	1.56	103.2	102.2	100.2	96.8	97.8	99.8	10.365	0	150.5	13
FKBP4	Q02790	Peptidyl-prolyl cis-trans isomerase FKBP4 [OS=Homo sapiens]	1.038	0	161.176	61.4379	28	198	28	1	459	51.772	5.43	High	High	High	High	High	High		101.8	98.2	0.59	0.61	101.4	102.5	101.6	98.6	97.5	98.4	27.289	0	580.689	28
SRI	P30626-1	Sorcin [OS=Homo sapiens]	1.038	0	41.2407	50	9	34	9	1	198	21.662	5.59	High	High	High	High	High	High		101.8	98.2	1.21	1.26	101.3	101	103.3	98.7	99	96.7	9	0	89.1424	9
HSPA9	P38646	Stress-70 protein, mitochondrial [OS=Homo sapiens]	1.037	0	290.521	58.0265	40	404	39	1	679	73.635	6.16	High	High	High	High	High	High		101.8	98.2	0.25	0.26	101.6	102.1	101.9	98.4	97.9	98.1	52.367	0	1297.63	40
C1QBP	Q07021	Complement component 1 Q subcomponent-binding protein, mitochondrial [OS=Homo sapiens]	1.037	0	49.6952	35.461	6	132	6	1	282	31.343	4.84	High	High	High	High	High	High		101.8	98.2	0.43	0.44	101.9	101.4	102.2	98.1	98.6	97.8	3.642	0	428.478	6
MRPL10	Q7Z7H8-2	Isoform 2 of 39S ribosomal protein L10, mitochondrial [OS=Homo sapiens]	1.037	0.00228796	9.38471	10.7011	2	4	2	1	271	30.288	9.25	High	High	High	High	High	High		101.8	98.2	2.4	2.48	102.2	99.2	104	97.8	100.8	96	0.468	0	9.61827	2
HMGN5	P82970	High mobility group nucleosome-binding domain-containing protein 5 [OS=Homo sapiens]	1.036	0	15.9012	16.3121	4	8	4	1	282	31.506	4.55	High	High	High	High	High	High		101.8	98.2	5.85	6.06	95.1	106.6	103.6	104.9	93.4	96.4	0.668	0	17.5109	4
POR	P16435	NADPH--cytochrome P450 reductase [OS=Homo sapiens]	1.036	0	71.4393	28.2127	17	53	17	1	677	76.641	5.58	High	High	High	High	High	High		101.8	98.2	0.69	0.71	102.5	101.1	101.6	97.5	98.9	98.4	2.695	0	130.559	17
PGAM5	Q96HS1-1	Serine/threonine-protein phosphatase Pgam5, mitochondrial [OS=Homo sapiens]	1.036	0	24.1638	20.7612	6	23	6	1	289	31.985	8.68	High	High	High	High	High	High		101.8	98.2	0.46	0.47	101.3	102.3	101.8	98.7	97.7	98.2	1.637	0	54.2295	6
MAPK1	P28482	mitogen-activated protein kinase 1 [OS=Homo sapiens]	1.034	0	35.9223	33.3333	10	31	7	1	360	41.363	6.98	High	High	High	High	High	High		101.7	98.3	0.76	0.79	100.8	102.2	102	99.2	97.8	98	2.325	3	74.1022	10
ACOT2	P49753-1	Acyl-coenzyme A thioesterase 2, mitochondrial [OS=Homo sapiens]	1.034	0	13.5679	10.559	4	5	4	1	483	53.185	8.47	High	High	Not Found	High	High	Not Found		101.7	98.3	1.1	1.14	102.5	100.9		97.5	99.1		0.334	0	13.7607	4
SLC25A10	Q9UBX3-2	Isoform 2 of Mitochondrial dicarboxylate carrier [OS=Homo sapiens]	1.032	0	31.4276	35.8108	8	18	8	1	296	32.125	9.35	High	High	High	High	High	High		101.6	98.4	0.82	0.84	100.8	102.4	101.5	99.2	97.6	98.5	1.637	0	62.9313	8
CS	O75390	citrate synthase, mitochondrial [OS=Homo sapiens]	1.03	0	69.8847	24.0343	11	95	11	1	466	51.68	8.32	High	High	High	High	High	High		101.5	98.5	0.5	0.51	101.1	101.3	102	98.9	98.7	98	7.185	0	243.6	11
YWHAE	P62258-1	14-3-3 protein epsilon [OS=Homo sapiens]	1.028	0	136.12	70.5882	19	212	16	1	255	29.155	4.74	High	High	High	High	High	High		101.4	98.6	0.39	0.4	101.8	101.3	101.1	98.2	98.7	98.9	86.992	3	700.22	19
HSDL1	Q3SXM5	Inactive hydroxysteroid dehydrogenase-like protein 1 [OS=Homo sapiens]	1.026	0.00228796	9.49111	7.57576	3	5	3	1	330	36.978	8.72	High	High	High	High	High	High		101.3	98.7	3.39	3.48	103.5	103	97.3	96.5	97	102.7	0.389	0	11.7529	3
VDAC3	Q9Y277-2	Isoform 2 of Voltage-dependent anion-selective channel protein 3 [OS=Homo sapiens]	1.026	0	54.9711	36.9718	9	76	8	1	284	30.77	8.66	High	High	High	High	High	High		101.3	98.7	1.72	1.77	102	99.3	102.6	98	100.7	97.4	4.456	0	238.94	9
YWHAZ	P63104-1	14-3-3 protein zeta/delta [OS=Homo sapiens]	1.026	0	147.366	69.3878	16	258	11	1	245	27.728	4.79	High	High	High	High	High	High		101.3	98.7	0.29	0.29	101	101.6	101.3	99	98.4	98.7	87.587	0	819.413	16
ATAD3A	Q9NVI7-2	Isoform 2 of ATPase family AAA domain-containing protein 3A [OS=Homo sapiens]	1.026	0	70.4916	37.884	21	51	21	1	586	66.177	9.25	High	High	High	High	High	High		101.3	98.7	0.65	0.67	102	100.7	101.2	98	99.3	98.8	2.248	0	137.367	21
ABHD11	Q8NFV4	Alpha/beta hydrolase domain-containing protein 11 [OS=Homo sapiens]	1.025	0	14.4898	15.873	5	7	5	1	315	34.668	9.48	High	High	High	High	High	High		101.2	98.8	5.86	6.01	107.9	99.2	96.6	92.1	100.8	103.4	0.896	0	18.4108	5
DLST	P36957	Dihydrolipoyllysine-residue succinyltransferase component of 2-oxoglutarate dehydrogenase complex, mitochondrial [OS=Homo sapiens]	1.025	0	48.9513	26.9316	10	32	10	1	453	48.724	8.95	High	High	High	High	High	High		101.2	98.8	0.47	0.48	100.9	101.8	101.1	99.1	98.2	98.9	2.831	0	95.1486	10
CERT	Q9Y5P4-3	Isoform 3 of Collagen type IV alpha-3-binding protein [OS=Homo sapiens]	1.025	0	12.2487	6.51596	4	7	4	1	752	83.655	6.27	High	High	High	High	High	High		101.2	98.8	5.8	5.94	108	97.7	97.9	92	102.3	102.1	0.207	0	14.4771	4
IARS2	Q9NSE4	Isoleucine--tRNA ligase, mitochondrial [OS=Homo sapiens]	1.024	0	57.3803	18.4783	17	35	17	1	1012	113.719	7.2	High	High	High	High	High	High		101.2	98.8	1.24	1.27	100.1	102.6	100.9	99.9	97.4	99.1	1.096	0	94.8333	17
AARS	P49588	Alanine--tRNA ligase, cytoplasmic [OS=Homo sapiens]	1.024	0	179.642	44.8347	36	126	36	1	968	106.743	5.53	High	High	High	High	High	High		101.2	98.8	1.05	1.08	102	101.5	100	98	98.5	100	5.723	0	386.68	36
PHB2	Q99623	Prohibitin-2 [OS=Homo sapiens]	1.024	0	106.247	70.5686	21	116	21	1	299	33.276	9.83	High	High	High	High	High	High		101.2	98.8	0.29	0.3	100.9	101.5	101.1	99.1	98.5	98.9	14.571	0	342.636	21
SLC25A5	P05141	ADP/ATP translocase 2 [OS=Homo sapiens]	1.024	0	105.179	44.6309	16	292	5	1	298	32.831	9.69	High	High	High	High	High	High		101.2	98.8	0.26	0.27	101.5	101.1	100.9	98.5	98.9	99.1	23.041	11	880.14	16
YWHAH	Q04917	14-3-3 protein eta [OS=Homo sapiens]	1.024	0	95.3653	63.4146	14	151	10	1	246	28.201	4.84	High	High	High	High	High	High		101.2	98.8	0.38	0.39	101.4	100.7	101.4	98.6	99.3	98.6	26.826	0	466.11	14
PABPC5	Q96DU9-1	Polyadenylate-binding protein 5 [OS=Homo sapiens]	1.024	0	12.1965	6.5445	3	14	1	1	382	43.303	9.51	High	High	Not Found	High	High	Not Found		101.2	98.8	4.69	4.8	97.8	104.6		102.2	95.4		0.425	0	35.0489	3
NME2	P22392-2	Isoform 3 of Nucleoside diphosphate kinase B [OS=Homo sapiens]	1.024	0	105.415	74.1573	15	188	2	1	267	30.118	8.92	High	High	High	High	High	High		101.2	98.8	0.46	0.47	101	100.8	101.7	99	99.2	98.3	25.827	13	497.16	15
HAGH	Q16775-1	Hydroxyacylglutathione hydrolase, mitochondrial [OS=Homo sapiens]	1.024	0.00487211	5.36237	4.87013	2	6	2	1	308	33.784	8.12	High	High	High	High	High	High		101.2	98.8	2.23	2.28	103.6	99.1	100.8	96.4	100.9	99.2	0.274	0	14.3027	2
TRAP1	Q12931	heat shock protein 75 kDa, mitochondrial [OS=Homo sapiens]	1.023	0	128.682	40.483	23	131	22	1	704	80.06	8.21	High	High	High	High	High	High		101.1	98.9	0.7	0.72	101.1	100.4	101.9	98.9	99.6	98.1	4.36	0	366.36	23
SLC25A20	O43772	mitochondrial carnitine/acylcarnitine carrier protein [OS=Homo sapiens]	1.023	0.00431099	6.61588	10.6312	2	3	2	1	301	32.922	9.41	High	High	Not Found	High	High	Not Found		101.1	98.9	1.01	1.03	101.9	100.4		98.1	99.6		0.259	0	3.65783	2
HADHB	P55084	Trifunctional enzyme subunit beta, mitochondrial [OS=Homo sapiens]	1.023	0	79.4026	31.6456	16	65	16	1	474	51.262	9.41	High	High	High	High	High	High		101.1	98.9	0.51	0.52	101.1	100.7	101.7	98.9	99.3	98.3	4.946	0	172.626	16
NGDN	Q8NEJ9	neuroguidin [OS=Homo sapiens]	1.023	0.00431099	6.56636	7.93651	2	3	2	1	315	35.872	9.57	Not Found	High	High	Not Found	High	High		101.1	98.9	11.16	11.41		93.2	109.1		106.8	90.9	0.311	0	6.96431	2
ADSS2	P30520	adenylosuccinate synthetase isozyme 2 [OS=Homo sapiens]	1.023	0	42.6558	26.3158	10	34	10	1	456	50.066	6.55	High	High	High	High	High	High		101.1	98.9	1.08	1.1	102.4	100.3	100.7	97.6	99.7	99.3	1.683	0	85.8108	10
GSK3A	P49840	Glycogen synthase kinase-3 alpha [OS=Homo sapiens]	1.023	0	16.6062	12.6294	4	10	2	1	483	50.949	8.75	High	High	High	High	High	High		101.1	98.9	3.24	3.31	101	97.9	104.4	99	102.1	95.6	0.468	0	21.1954	4
CPNE3	O75131	Copine-3 [OS=Homo sapiens]	1.023	0	85.314	40.9683	18	61	18	1	537	60.092	5.85	High	High	High	High	High	High		101.1	98.9	0.43	0.44	100.6	101.4	101.4	99.4	98.6	98.6	5.31	0	174.59	18
USP15	Q9Y4E8	ubiquitin carboxyl-terminal hydrolase 15 [OS=Homo sapiens]	1.022	0	33.1511	11.4169	9	19	9	1	981	112.348	5.22	High	High	High	High	High	High		101.1	98.9	1.32	1.35	102.6	100.1	100.5	97.4	99.9	99.5	0.487	0	45.9211	9
SCCPDH	Q8NBX0	saccharopine dehydrogenase-like oxidoreductase [OS=Homo sapiens]	1.022	0	18.0027	11.1888	4	9	4	1	429	47.121	9.14	High	High	High	High	High	High		101.1	98.9	1.73	1.76	101.1	102.8	99.3	98.9	97.2	100.7	0.65	0	29.7063	4
PKM	P14618	Pyruvate kinase PKM [OS=Homo sapiens]	1.021	0	309.654	73.0697	38	811	3	1	531	57.9	7.84	High	High	High	High	High	High		101.1	98.9	0.12	0.12	100.9	101.1	101.2	99.1	98.9	98.8	112.254	38	2453.89	38
DHTKD1	Q96HY7	Probable 2-oxoglutarate dehydrogenase E1 component DHKTD1, mitochondrial [OS=Homo sapiens]	1.021	0.00467997	5.55521	2.72035	2	4	2	1	919	103.011	6.93	High	High	High	High	High	High		101	99	4.25	4.34	104.4	96.2	102.5	95.6	103.8	97.5	0.108	0	7.53029	2
RAP1GDS1	P52306-5	Isoform 5 of Rap1 GTPase-GDP dissociation stimulator 1 [OS=Homo sapiens]	1.021	0	27.7186	12.5	6	13	6	1	608	66.346	5.31	High	High	High	High	High	High		101	99	1.6	1.64	102.8	100.7	99.6	97.2	99.3	100.4	0.482	0	33.205	6
NDUFAF2	Q8N183	Mimitin, mitochondrial [OS=Homo sapiens]	1.02	0	14.9159	29.5858	4	6	4	1	169	19.844	8.97	High	Not Found	High	High	Not Found	High		101	99	3.63	3.7	103.6		98.4	96.4		101.6	1.31	0	21.2421	4
DDX6	P26196	Probable ATP-dependent RNA helicase DDX6 [OS=Homo sapiens]	1.019	0	66.0914	38.5093	14	48	13	1	483	54.382	8.66	High	High	High	High	High	High		100.9	99.1	1.18	1.2	102.3	100	100.5	97.7	100	99.5	3.175	1	138.953	14
ECHS1	P30084	Enoyl-CoA hydratase, mitochondrial [OS=Homo sapiens]	1.019	0	89.5961	53.4483	14	71	14	1	290	31.367	8.07	High	High	High	High	High	High		100.9	99.1	1.19	1.21	102.3	100.5	100	97.7	99.5	100	14.849	0	207.558	14
SARS2	Q9NP81-1	Serine--tRNA ligase, mitochondrial [OS=Homo sapiens]	1.019	0	16.4739	13.8996	5	8	5	1	518	58.246	8.13	High	High	High	High	High	High		101	99	3.68	3.75	101.8	104.2	96.9	98.2	95.8	103.1	0.403	0	20.6492	5
SUCLA2	Q9P2R7	Succinyl-CoA ligase [ADP-forming] subunit beta, mitochondrial [OS=Homo sapiens]	1.018	0	36.789	20.3024	9	22	9	1	463	50.285	7.42	High	High	High	High	High	High		100.9	99.1	0.81	0.82	100.5	101.8	100.3	99.5	98.2	99.7	1.212	0	57.6026	9
ETFB	P38117	electron transfer flavoprotein subunit beta [OS=Homo sapiens]	1.018	0	60.1713	52.549	14	55	14	1	255	27.826	8.1	High	High	High	High	High	High		100.9	99.1	0.93	0.95	101.7	99.9	101.1	98.3	100.1	98.9	9	0	162.532	14
ETFA	P13804-1	Electron transfer flavoprotein subunit alpha, mitochondrial [OS=Homo sapiens]	1.018	0	94.1506	61.2613	15	79	15	1	333	35.058	8.38	High	High	High	High	High	High		100.9	99.1	0.27	0.27	100.7	101.2	100.8	99.3	98.8	99.2	10.053	0	231.038	15
NAPG	Q99747	Gamma-soluble NSF attachment protein [OS=Homo sapiens]	1.017	0	25.4679	30.1282	9	13	9	1	312	34.724	5.41	High	High	High	High	High	High		100.9	99.1	1.07	1.09	101.5	99.6	101.4	98.5	100.4	98.6	1.818	0	31.7434	9
STOML2	Q9UJZ1	Stomatin-like protein 2, mitochondrial [OS=Homo sapiens]	1.017	0	63.0765	51.6854	11	35	11	1	356	38.51	7.39	High	High	High	High	High	High		100.8	99.2	0.2	0.2	101	100.9	100.6	99	99.1	99.4	3.467	0	126.087	11
TOMM40	O96008	Mitochondrial import receptor subunit TOM40 homolog [OS=Homo sapiens]	1.016	0	41.5441	26.8698	5	31	5	1	361	37.869	7.25	High	High	High	High	High	High		100.8	99.2	0.94	0.96	101.9	100.1	100.4	98.1	99.9	99.6	3.217	0	97.2463	5
VPS35	Q96QK1	Vacuolar protein sorting-associated protein 35 [OS=Homo sapiens]	1.016	0	64.1147	21.3568	17	53	17	1	796	91.649	5.49	High	High	High	High	High	High		100.8	99.2	0.9	0.92	99.9	101.7	100.8	100.1	98.3	99.2	1.399	0	151.209	17
MPST	P25325-2	Isoform 2 of 3-mercaptopyruvate sulfurtransferase [OS=Homo sapiens]	1.016	0	12.7135	22.082	5	9	5	1	317	35.228	6.61	High	High	High	High	High	High		100.8	99.2	0.88	0.89	100.7	100	101.7	99.3	100	98.3	0.73	0	21.2991	5
YWHAB	P31946	14-3-3 protein beta/alpha [OS=Homo sapiens]	1.015	0	109.449	60.5691	13	168	6	1	246	28.065	4.83	High	High	High	High	High	High		100.7	99.3	0.81	0.82	101.7	100.1	100.4	98.3	99.9	99.6	49.802	0	516.748	13
LRRC59	Q96AG4	Leucine-rich repeat-containing protein 59 [OS=Homo sapiens]	1.014	0	91.4467	48.5342	14	119	14	1	307	34.909	9.57	High	High	High	High	High	High		100.7	99.3	0.62	0.63	101.4	100.5	100.2	98.6	99.5	99.8	20.544	0	326.807	14
DCK	P27707	deoxycytidine kinase [OS=Homo sapiens]	1.014	0	24.0119	30.3846	6	15	6	1	260	30.499	5.21	High	High	High	High	High	High		100.7	99.3	2.84	2.88	100.6	103.6	97.9	99.4	96.4	102.1	1.738	0	35.9675	6
CNP	P09543-1	2',3'-cyclic-nucleotide 3'-phosphodiesterase [OS=Homo sapiens]	1.014	0	40.169	25.8907	11	31	10	1	421	47.549	9.07	High	High	High	High	High	High		100.7	99.3	1.63	1.65	99.1	100.6	102.4	100.9	99.4	97.6	1.548	1	72.8789	11
RPS3	P23396-1	40S ribosomal protein S3 [OS=Homo sapiens]	1.014	0	119.647	77.3663	18	210	18	1	243	26.671	9.66	High	High	High	High	High	High		100.7	99.3	0.2	0.2	100.9	100.7	100.5	99.1	99.3	99.5	60.585	0	614.74	18
NOL3	O60936-3	Isoform 3 of Nucleolar protein 3 [OS=Homo sapiens]	1.013	0	16.0925	20.7407	4	6	4	1	270	29.337	4.3	High	High	High	High	High	High		100.6	99.4	3.81	3.86	96.4	101.7	103.8	103.6	98.3	96.2	0.931	0	20.1391	4
MCCC2	Q9HCC0-1	Methylcrotonoyl-CoA carboxylase beta chain, mitochondrial [OS=Homo sapiens]	1.013	0	65.5281	32.5044	15	40	15	1	563	61.294	7.68	High	High	High	High	High	High		100.6	99.4	1.49	1.51	99.2	100.6	102.2	100.8	99.4	97.8	2.268	0	113.885	15
KARS1	Q15046-2	Isoform Mitochondrial of Lysine--tRNA ligase [OS=Homo sapiens]	1.013	0	105.286	31.84	21	98	21	1	625	71.451	6.81	High	High	High	High	High	High		100.6	99.4	0.43	0.44	101.1	100.4	100.3	98.9	99.6	99.7	5.469	0	271.574	21
IDH3A	P50213-1	Isocitrate dehydrogenase [NAD] subunit alpha, mitochondrial [OS=Homo sapiens]	1.012	0	56.3804	27.3224	11	50	11	1	366	39.566	6.92	High	High	High	High	High	High		100.6	99.4	0.39	0.39	100.1	100.9	100.7	99.9	99.1	99.3	6.197	0	137.353	11
MAPT	P10636-5	Isoform Tau-C of Microtubule-associated protein tau [OS=Homo sapiens]	1.012	0	30.0076	25.3659	8	11	8	1	410	42.577	7.37	High	High	High	High	High	High		100.6	99.4	2.67	2.7	100.8	103.1	97.8	99.2	96.9	102.2	1.31	0	32.8371	8
ATP5PB	P24539	ATP synthase F(0) complex subunit B1, mitochondrial [OS=Homo sapiens]	1.011	0	28.0144	33.2031	8	20	8	1	256	28.89	9.36	High	High	High	High	High	High		100.6	99.4	1.03	1.04	99.8	101.7	100.1	100.2	98.3	99.9	2.384	0	57.161	8
SLC25A24	Q6NUK1	Calcium-binding mitochondrial carrier protein SCaMC-1 [OS=Homo sapiens]	1.01	0	70.8419	34.8008	15	57	15	1	477	53.32	6.33	High	High	High	High	High	High		100.5	99.5	0.34	0.34	100.9	100.2	100.5	99.1	99.8	99.5	4.012	0	160.65	15
DECR1	Q16698	2,4-dienoyl-CoA reductase, mitochondrial [OS=Homo sapiens]	1.01	0	61.8319	45.6716	13	45	13	1	335	36.045	9.28	High	High	High	High	High	High		100.5	99.5	5.03	5.09	104.9	101.6	95	95.1	98.4	105	6.305	0	116.802	13
DDX1	Q92499	ATP-dependent RNA helicase DDX1 [OS=Homo sapiens]	1.01	0	130.299	45	28	102	28	1	740	82.38	7.23	High	High	High	High	High	High		100.5	99.5	1.04	1.05	101.4	99.3	100.7	98.6	100.7	99.3	4.834	0	295.006	28
DNM1L	O00429-6	Isoform 6 of Dynamin-1-like protein [OS=Homo sapiens]	1.01	0	84.069	31.1081	20	48	20	1	749	83.347	7.08	High	High	High	High	High	High		100.5	99.5	0.33	0.33	100.7	100.7	100.1	99.3	99.3	99.9	1.837	0	127.523	20
SAMM50	Q9Y512	sorting and assembly machinery component 50 homolog [OS=Homo sapiens]	1.009	0	28.9342	24.307	9	18	9	1	469	51.943	6.9	High	High	High	High	High	High		100.4	99.6	1.1	1.11	101.6	100.2	99.5	98.4	99.8	100.5	0.911	0	48.3354	9
ACO1	P21399	Cytoplasmic aconitate hydratase [OS=Homo sapiens]	1.009	0	64.1129	24.8594	19	43	19	1	889	98.337	6.68	High	High	High	High	High	High		100.4	99.6	1.3	1.31	100.8	101.5	99	99.2	98.5	101	1.512	0	109.021	19
LACTB2	Q53H82	Beta-lactamase-like protein 2 [OS=Homo sapiens]	1.009	0	33.4033	38.1944	8	19	8	1	288	32.785	6.8	High	High	High	High	High	High		100.4	99.6	1.95	1.97	98.6	102.5	100.3	101.4	97.5	99.7	3.217	0	40.5976	8
RPS6KB1	P23443-1	Ribosomal protein S6 kinase beta-1 [OS=Homo sapiens]	1.009	0	21.7585	12.9524	6	11	5	1	525	59.102	6.65	High	High	High	High	High	High		100.5	99.5	3.64	3.67	104.6	97.6	99.2	95.4	102.4	100.8	0.701	0	31.3503	6
ARL2	P36404	ADP-ribosylation factor-like protein 2 [OS=Homo sapiens]	1.008	0.00734607	4.68512	11.413	2	4	2	1	184	20.865	6.34	High	High	High	High	High	High		100.4	99.6	0.76	0.77		101	99.9		99	100.1	0.52	0	11.3256	2
MTHFD1	P11586	C-1-tetrahydrofolate synthase, cytoplasmic [OS=Homo sapiens]	1.007	0	249.465	53.4759	42	216	42	1	935	101.495	7.3	High	High	High	High	High	High		100.4	99.6	0.28	0.28	100.1	100.5	100.5	99.9	99.5	99.5	11.589	0	608.036	42
THOP1	P52888	thimet oligopeptidase [OS=Homo sapiens]	1.006	0	39.2594	16.4006	11	25	11	1	689	78.789	6.05	High	High	High	High	High	High		100.3	99.7	0.88	0.89	100.6	101	99.3	99.4	99	100.7	0.855	0	75.0783	11
HADHA	P40939	Trifunctional enzyme subunit alpha, mitochondrial [OS=Homo sapiens]	1.006	0	152.325	41.9397	26	124	26	1	763	82.947	9.04	High	High	High	High	High	High		100.3	99.7	0.3	0.3	100.6	100.2	100.1	99.4	99.8	99.9	6.743	0	381.84	26
BCAT1	P54687-5	Isoform 5 of Branched-chain-amino-acid aminotransferase, cytosolic [OS=Homo sapiens]	1.006	0.00228796	10.799	8.29146	3	7	3	1	398	44.103	5.39	High	High	High	High	High	High		100.3	99.7	1.55	1.56	99.3	99.5	102.1	100.7	100.5	97.9	0.719	0	14.8054	3
RMND1	Q9NWS8	Required for meiotic nuclear division protein 1 homolog [OS=Homo sapiens]	1.003	0.00445001	5.67359	5.12249	2	4	2	1	449	51.571	8.69	High	High	High	High	High	High		100.2	99.8	2.79	2.8	102.8	97.3	100.4	97.2	102.7	99.6	0.166	0	9.62857	2
TACO1	Q9BSH4	Translational activator of cytochrome c oxidase 1 [OS=Homo sapiens]	1.003	0	13.9825	13.1313	3	8	3	1	297	32.457	8.13	High	High	High	High	High	High		100.2	99.8	1.44	1.45	99	99.7	101.8	101	100.3	98.2	0.668	0	17.1334	3
MCCC1	Q96RQ3	Methylcrotonoyl-CoA carboxylase subunit alpha, mitochondrial [OS=Homo sapiens]	1.003	0.00293207	7.94276	4.55172	3	4	3	1	725	80.422	7.78	High	High	Not Found	High	High	Not Found		100.1	99.9	0.94	0.94	100.8	99.5		99.2	100.5		0.166	0	6.71243	3
HARS	P12081	Histidine--tRNA ligase, cytoplasmic [OS=Homo sapiens]	1.003	0	61.9838	28.4872	15	46	10	1	509	57.374	5.88	High	High	High	High	High	High		100.1	99.9	0.55	0.55	100.2	100.7	99.6	99.8	99.3	100.4	2.268	5	125.318	15
DNAJA1	P31689-1	DnaJ homolog subfamily A member 1 [OS=Homo sapiens]	1.003	0	75.2429	45.3401	14	48	14	1	397	44.839	7.08	High	High	High	High	High	High		100.1	99.9	0.09	0.09	100.2	100	100.2	99.8	100	99.8	8.006	0	137.174	14
MCU	Q8NE86	Calcium uniporter protein, mitochondrial [OS=Homo sapiens]	1.002	0.00445001	5.71152	5.69801	2	5	2	1	351	39.842	8.65	High	High	High	High	High	High		100.1	99.9	0.59	0.59	100.5	100.4	99.4	99.5	99.6	100.6	0.274	0	14.7361	2
ALDH7A1	P49419	Alpha-aminoadipic semialdehyde dehydrogenase [OS=Homo sapiens]	1.002	0	42.3659	19.295	9	27	9	1	539	58.45	7.99	High	High	High	High	High	High		100.1	99.9	1.9	1.91	98.5	99.7	102.2	101.5	100.3	97.8	1.326	0	72.4055	9
MMAB	Q96EY8	Cob(I)yrinic acid a,c-diamide adenosyltransferase, mitochondrial [OS=Homo sapiens]	1.002	0	17.1634	20.8	4	11	4	1	250	27.371	8.6	High	High	High	High	High	High		100.1	99.9	0.66	0.66	99.3	100.4	100.5	100.7	99.6	99.5	0.848	0	32.7119	4
SHC1	P29353-6	Isoform 6 of SHC-transforming protein 1 [OS=Homo sapiens]	1.002	0.00431099	6.70381	5.65068	2	3	2	1	584	62.854	6.44	High	High	High	High	High	High		100.1	99.9	10.65	10.67	93.3	94.7	112.4	106.7	105.3	87.6	0.166	0	7.70322	2
ATP5PF	P18859-2	Isoform 2 of ATP synthase-coupling factor 6, mitochondrial [OS=Homo sapiens]	1.002	0	23.4795	47.4138	5	25	5	1	116	13.38	9.07	High	High	High	High	High	High		100.1	99.9	0.13	0.13	100.1	100	100.2	99.9	100	99.8	9	0	57.0131	5
MT-CO2	P00403	Cytochrome c oxidase subunit 2 [OS=Homo sapiens]	1.001	0	17.7786	17.6211	4	16	4	1	227	25.548	4.82	High	High	High	High	High	High		100	100	1.17	1.17	98.7	101	100.4	101.3	99	99.6	3.642	0	48.0018	4
NOC3L	Q8WTT2	Nucleolar complex protein 3 homolog [OS=Homo sapiens]	1.001	0	25.1044	9.625	8	16	8	1	800	92.49	9.17	High	High	High	High	High	High		100	100	0.54	0.54	99.8	99.6	100.6	100.2	100.4	99.4	0.535	0	44.0138	8
IDH3G	P51553-1	isocitrate dehydrogenase [NAD] subunit gamma, mitochondrial [OS=Homo sapiens]	1.001	0.00228796	11.4275	9.66921	3	12	3	1	393	42.767	8.5	High	High	High	High	High	High		100.1	99.9	1.14	1.15	98.8	100.3	101.1	101.2	99.7	98.9	0.668	0	24.892	3
ATP5F1B	P06576	ATP synthase subunit beta, mitochondrial [OS=Homo sapiens]	1	0	154.694	58.9792	21	194	21	1	529	56.525	5.4	High	High	High	High	High	High		100	100	0.31	0.31	100	100.4	99.7	100	99.6	100.3	11.496	0	593.072	21
ATP5F1A	P25705-1	ATP synthase subunit alpha, mitochondrial [OS=Homo sapiens]	1	0	136.885	50.4521	24	163	24	1	553	59.714	9.13	High	High	High	High	High	High		100	100	0.43	0.43	99.6	100.4	100	100.4	99.6	100	9	0	449.257	24
CYB5A	P00167-1	Cytochrome b5 [OS=Homo sapiens]	1	0	12.1318	23.1343	3	7	3	1	134	15.321	4.96	High	High	High	High	High	High		100	100	0.5	0.5	99.7	99.8	100.6	100.3	100.2	99.4	1.783	0	20.1334	3
PFDN4	Q9NQP4	Prefoldin subunit 4 [OS=Homo sapiens]	0.998	0	24.0107	37.3134	4	13	4	1	134	15.305	4.53	High	High	High	High	High	High		99.9	100.1	2.7	2.69	98.8	98	103	101.2	102	97	4.623	0	40.5665	4
SUCLG1	P53597	Succinyl-CoA ligase [ADP/GDP-forming] subunit alpha, mitochondrial [OS=Homo sapiens]	0.998	0	31.6765	26.8786	8	20	8	1	346	36.227	8.79	High	High	High	High	High	High		99.9	100.1	1.48	1.47	100.9	100.6	98.2	99.1	99.4	101.8	2.981	0	58.6693	8
MRPL12	P52815	39S ribosomal protein L12, mitochondrial [OS=Homo sapiens]	0.998	0	44.3403	39.899	6	24	6	1	198	21.335	8.87	High	High	High	High	High	High		99.9	100.1	1.58	1.58	99.3	98.7	101.7	100.7	101.3	98.3	11.328	0	73.4445	6
IDH1	O75874	Isocitrate dehydrogenase [NADP] cytoplasmic [OS=Homo sapiens]	0.998	0	107.807	47.5845	21	98	19	1	414	46.63	7.01	High	High	High	High	High	High		99.9	100.1	0.49	0.49	100.3	99.4	100.1	99.7	100.6	99.9	11.589	0	253.771	21
CLPP	Q16740	ATP-dependent Clp protease proteolytic subunit, mitochondrial [OS=Homo sapiens]	0.998	0	31.0978	32.852	7	20	7	1	277	30.161	8.09	High	High	High	High	High	High		99.9	100.1	0.16	0.16	99.9	99.8	100.1	100.1	100.2	99.9	2.652	0	48.4743	7
ARGLU1	Q9NWB6	Arginine and glutamate-rich protein 1 [OS=Homo sapiens]	0.997	0	19.3583	21.6117	8	16	8	1	273	33.197	10.35	High	High	High	High	High	High		99.8	100.2	9.69	9.66	107.1	103.5	88.9	92.9	96.5	111.1	2.415	0	38.5061	8
ALDH1B1	P30837	Aldehyde dehydrogenase X, mitochondrial [OS=Homo sapiens]	0.996	0.00445001	5.63209	5.60928	2	3	2	1	517	57.17	6.8	High	Not Found	High	High	Not Found	High		99.8	100.2	3.39	3.38	97.4		102.2	102.6		97.8	0.172	0	8.5688	2
CLIC1	O00299	chloride intracellular channel protein 1 [OS=Homo sapiens]	0.995	0	100.578	79.668	14	161	14	1	241	26.906	5.17	High	High	High	High	High	High		99.8	100.2	0.91	0.9	100.5	100	98.8	99.5	100	101.2	28.552	0	495.853	14
CPT2	P23786	Carnitine O-palmitoyltransferase 2, mitochondrial [OS=Homo sapiens]	0.995	0	25.7879	12.462	8	15	8	1	658	73.73	8.18	High	High	High	High	High	High		99.8	100.2	0.42	0.42	99.5	99.5	100.2	100.5	100.5	99.8	0.535	0	37.4084	8
TIMM9	Q9Y5J7	Mitochondrial import inner membrane translocase subunit Tim9 [OS=Homo sapiens]	0.995	0	23.6224	65.1685	5	13	5	1	89	10.371	7.21	High	High	High	High	High	High		99.7	100.3	2.31	2.3	100.8	97.1	101.3	99.2	102.9	98.7	13.678	0	33.0499	5
NLN	Q9BYT8	Neurolysin, mitochondrial [OS=Homo sapiens]	0.995	0	45.5065	16.6193	10	29	10	1	704	80.6	6.64	High	High	High	High	High	High		99.7	100.3	0.98	0.97	99.1	99.2	100.9	100.9	100.8	99.1	1.239	0	72.2854	10
C12orf10	Q9HB07	UPF0160 protein MYG1, mitochondrial [OS=Homo sapiens]	0.995	0	23.4932	24.734	7	14	7	1	376	42.422	6.67	High	High	High	High	High	High		99.7	100.3	0.69	0.69	99.7	100.4	99	100.3	99.6	101	0.778	0	42.7267	7
FDXR	P22570-3	Isoform 3 of NADPH:adrenodoxin oxidoreductase, mitochondrial [OS=Homo sapiens]	0.995	0	14.4652	14.0449	5	12	5	1	534	58.267	7.87	High	High	High	High	High	High		99.8	100.2	1.98	1.97	99.8	101.7	97.8	100.2	98.3	102.2	0.403	0	24.9052	5
PPP6C	O00743-3	Isoform 3 of Serine/threonine-protein phosphatase 6 catalytic subunit [OS=Homo sapiens]	0.995	0	19.5693	19.2982	5	13	5	1	342	38.921	6.18	High	High	High	High	High	High		99.7	100.3	1.2	1.19	98.4	100.6	100.2	101.6	99.4	99.8	0.874	0	35.6297	5
ABCE1	P61221	ATP-binding cassette sub-family E member 1 [OS=Homo sapiens]	0.994	0	99.4036	39.0651	21	67	21	1	599	67.271	8.34	High	High	High	High	High	High		99.7	100.3	0.26	0.25	99.4	99.9	99.8	100.6	100.1	100.2	5.391	0	189.723	21
MTX2	O75431	Metaxin-2 [OS=Homo sapiens]	0.994	0	15.5023	20.1521	4	9	4	1	263	29.744	6.29	High	High	High	High	High	High		99.7	100.3	1.51	1.5	100.6	100.5	98	99.4	99.5	102	1.031	0	31.4232	4
FAHD1	Q6P587-3	Isoform 3 of Acylpyruvase FAHD1, mitochondrial [OS=Homo sapiens]	0.994	0	13.4093	14.9194	3	10	3	1	248	27.111	7.69	High	High	High	High	High	High		99.7	100.3	2.19	2.18	97.3	100.4	101.5	102.7	99.6	98.5	0.668	0	20.1203	3
CAPN2	P17655-1	Calpain-2 catalytic subunit [OS=Homo sapiens]	0.994	0	12.1862	8.71429	4	6	4	1	700	79.945	4.98	High	High	High	High	High	High		99.7	100.3	1.23	1.23		98.8	100.6		101.2	99.4	0.274	0	11.2168	4
TUFM	P49411	elongation factor Tu, mitochondrial [OS=Homo sapiens]	0.993	0	136.602	63.7168	24	130	24	1	452	49.51	7.61	High	High	High	High	High	High		99.7	100.3	0.47	0.47	99.2	100.1	99.8	100.8	99.9	100.2	12.335	0	370.573	24
GSR	P00390	Glutathione reductase, mitochondrial [OS=Homo sapiens]	0.993	0	44.8542	19.3487	8	27	8	1	522	56.221	8.5	High	High	High	High	High	High		99.7	100.3	0.24	0.24	99.9	99.5	99.6	100.1	100.5	100.4	1.593	0	70.2904	8
RHOT2	Q8IXI1	Mitochondrial Rho GTPase 2 [OS=Homo sapiens]	0.993	0	16.4006	6.47249	3	14	2	1	618	68.075	5.86	High	High	High	High	High	High		99.6	100.4	1.86	1.85	98	99.2	101.7	102	100.8	98.3	0.468	1	32.2965	3
ATP5PD	O75947-1	ATP synthase subunit d, mitochondrial [OS=Homo sapiens]	0.992	0	40.2016	51.5528	8	33	8	1	161	18.479	5.3	High	High	High	High	High	High		99.6	100.4	1.22	1.21	101	98.6	99.3	99	101.4	100.7	14.199	0	81.867	8
MTCH2	Q9Y6C9	Mitochondrial carrier homolog 2 [OS=Homo sapiens]	0.991	0	20.4915	22.7723	6	11	6	1	303	33.309	7.97	High	High	High	High	High	High		99.6	100.4	1.98	1.96	100.7	97.3	100.7	99.3	102.7	99.3	1.371	0	28.7211	6
HARS2	P49590	probable histidine--tRNA ligase, mitochondrial [OS=Homo sapiens]	0.991	0	35.5254	16.6008	8	21	3	1	506	56.852	8.24	High	High	High	High	High	High		99.5	100.5	4.51	4.47	103.3	100.8	94.6	96.7	99.2	105.4	0.968	0	52.1677	8
ALDH5A1	P51649-2	Isoform 2 of Succinate-semialdehyde dehydrogenase, mitochondrial [OS=Homo sapiens]	0.991	0	15.0427	7.66423	4	7	4	1	548	58.616	8.09	High	High	High	High	High	High		99.6	100.4	1.14	1.13	98.8		100.4	101.2		99.6	0.389	0	21.2267	4
CPT1A	P50416	Carnitine O-palmitoyltransferase 1, liver isoform [OS=Homo sapiens]	0.99	0	40.1432	13.9715	9	23	9	1	773	88.311	8.65	High	High	High	High	High	High		99.5	100.5	1.52	1.51	101.2	98.5	98.8	98.8	101.5	101.2	0.734	0	58.7272	9
BNIP1	Q12981	Vesicle transport protein SEC20 [OS=Homo sapiens]	0.99	0.00228796	10.387	11.8421	3	4	3	1	228	26.116	8.95	High	High	High	High	High	High		99.5	100.5	2.12	2.1	98.8	97.8	101.9	101.2	102.2	98.1	0.54	0	10.5489	3
EXD2	Q9NVH0	Exonuclease 3'-5' domain-containing protein 2 [OS=Homo sapiens]	0.99	0.00228796	9.83778	6.28019	3	4	3	1	621	70.308	8.32	High	High	High	High	High	High		99.5	100.5	4.35	4.31	99.2	104	95.3	100.8	96	104.7	0.189	0	9.56799	3
ACADSB	P45954	Short/branched chain specific acyl-CoA dehydrogenase, mitochondrial [OS=Homo sapiens]	0.989	0	15.7901	15.5093	5	8	5	1	432	47.455	6.99	High	High	High	High	High	High		99.5	100.5	0.98	0.97	99.9	100.2	98.4	100.1	99.8	101.6	0.532	0	17.2972	5
RACK1	P63244	Guanine nucleotide-binding protein subunit beta-2-like 1 [OS=Homo sapiens]	0.989	0	116.418	69.7161	17	173	17	1	317	35.055	7.69	High	High	High	High	High	High		99.4	100.6	0.34	0.34	99.2	99.3	99.8	100.8	100.7	100.2	24.65	0	549.246	17
COQ9	O75208-1	Ubiquinone biosynthesis protein COQ9, mitochondrial [OS=Homo sapiens]	0.989	0	11.9471	13.2075	3	4	3	1	318	35.487	5.94	High	High	High	High	High	High		99.5	100.5	0.14	0.14		99.6	99.4		100.4	100.6	0.438	0	13.2708	3
GRPEL1	Q9HAV7	GrpE protein homolog 1, mitochondrial [OS=Homo sapiens]	0.988	0	49.1965	52.9954	11	47	11	1	217	24.264	8.12	High	High	High	High	High	High		99.4	100.6	1	0.98	98.5	100.4	99.4	101.5	99.6	100.6	5.813	0	130.039	11
NIF3L1	Q9GZT8-1	NIF3-like protein 1 [OS=Homo sapiens]	0.988	0.00467997	5.4213	4.77454	2	4	2	1	377	41.942	6.65	High	High	High	High	High	High		99.4	100.6	0.25	0.24	99.2		99.6	100.8		100.4	0.233	0	11.0273	2
HMGCL	P35914	Hydroxymethylglutaryl-CoA lyase, mitochondrial [OS=Homo sapiens]	0.987	0.00228796	8.11809	10.4615	4	4	4	1	325	34.338	8.54	High	High	High	High	High	High		99.4	100.6	6.26	6.18	92.7	104.9	100.5	107.3	95.1	99.5	0.668	0	5.78197	4
TMEM173	Q86WV6	Stimulator of interferon genes protein [OS=Homo sapiens]	0.987	0.00228796	8.32124	8.97098	2	3	2	1	379	42.166	7.05	High	High	High	High	High	High		99.4	100.6	3.66	3.61		101.9	96.8		98.1	103.2	0.274	0	9.92964	2
ACO2	Q99798	Aconitate hydratase, mitochondrial [OS=Homo sapiens]	0.987	0	88.6059	27.5641	19	60	19	1	780	85.372	7.61	High	High	High	High	High	High		99.3	100.7	0.29	0.28	99.6	99	99.3	100.4	101	100.7	2.849	0	167.568	19
HK1	P19367-3	Isoform 3 of Hexokinase-1 [OS=Homo sapiens]	0.987	0	187.909	41.2595	34	131	30	1	921	102.672	6.76	High	High	High	High	High	High		99.3	100.7	0.68	0.67	98.6	100	99.3	101.4	100	100.7	7.84	4	356.53	34
OXCT1	P55809	Succinyl-CoA:3-ketoacid coenzyme A transferase 1, mitochondrial [OS=Homo sapiens]	0.986	0.00353243	7.73927	8.65385	3	5	3	1	520	56.122	7.46	High	High	High	High	High	High		99.3	100.7	4.35	4.29		102.4	96.3		97.6	103.7	0.269	0	8.76582	3
ACSL1	P33121	Long-chain-fatty-acid--CoA ligase 1 [OS=Homo sapiens]	0.986	0	36.2299	15.3295	10	26	10	1	698	77.893	7.15	High	High	High	High	High	High		99.3	100.7	0.73	0.72	98.9	98.9	100.1	101.1	101.1	99.9	0.914	0	61.3086	10
LETM1	O95202-1	LETM1 and EF-hand domain-containing protein 1, mitochondrial [OS=Homo sapiens]	0.985	0	93.4182	27.0636	17	44	17	1	739	83.302	6.7	High	High	High	High	High	High		99.2	100.8	0.78	0.77	100.1	98.8	98.8	99.9	101.2	101.2	2.495	0	136.932	17
NUDT1	P36639	7,8-dihydro-8-oxoguanine triphosphatase [OS=Homo sapiens]	0.984	0	17.5214	23.3503	4	11	4	1	197	22.505	5.27	High	High	High	High	High	High		99.2	100.8	1.31	1.29	98.1	100.7	98.8	101.9	99.3	101.2	1.154	0	38.8868	4
DUT	P33316-3	Deoxyuridine 5'-triphosphate nucleotidohydrolase, mitochondrial [OS=Homo sapiens]	0.983	0	65.3918	42.4603	8	104	8	1	252	26.547	9.36	High	High	High	High	High	High		99.1	100.9	0.59	0.58	99.5	98.5	99.5	100.5	101.5	100.5	6.627	0	339.873	8
KYNU	Q16719	kynureninase [OS=Homo sapiens]	0.981	0	25.3569	16.3441	7	15	7	1	465	52.318	7.03	High	High	High	High	High	High		99.1	100.9	1.64	1.61	97.4	100.7	99.1	102.6	99.3	100.9	0.848	0	35.317	7
PPP1CC	P36873-2	Isoform Gamma-2 of Serine/threonine-protein phosphatase PP1-gamma catalytic subunit [OS=Homo sapiens]	0.981	0	64.8504	42.1365	12	43	1	1	337	38.493	6.13	High	High	High	High	High	High		99	101	1.2	1.18	100	97.7	99.4	100	102.3	100.6	4.337	0	146.477	12
UQCRQ	O14949	Cytochrome b-c1 complex subunit 8 [OS=Homo sapiens]	0.98	0.00228796	8.41484	30.4878	3	5	3	1	82	9.9	10.08	High	High	High	High	High	High		99	101	3.11	3.05	96.8	102.5	97.7	103.2	97.5	102.3	2.162	0	11.1827	3
MAPK3	P27361-1	mitogen-activated protein kinase 3 [OS=Homo sapiens]	0.98	0	31.3255	27.7045	9	21	6	1	379	43.108	6.74	High	High	High	High	High	High		99	101	0.87	0.85	99.9	98.2	99	100.1	101.8	101	2.008	0	55.7892	9
SORD	Q00796	Sorbitol dehydrogenase [OS=Homo sapiens]	0.979	0	55.0118	40.056	12	39	12	1	357	38.3	7.97	High	High	High	High	High	High		98.9	101.1	4.02	3.94	101.6	100.9	94.4	98.4	99.1	105.6	3.489	0	110.392	12
DHODH	Q02127	Dihydroorotate dehydrogenase (Quinone), mitochondrial [OS=Homo sapiens]	0.979	0.00228796	8.58994	7.08861	2	4	2	1	395	42.841	9.67	High	High	High	High	High	High		98.9	101.1	3.84	3.76	99.6	94.9	102.4	100.4	105.1	97.6	0.222	0	10.2497	2
PITRM1	Q5JRX3-2	Isoform 2 of Presequence protease, mitochondrial [OS=Homo sapiens]	0.979	0	69.1894	22.6397	20	43	20	1	1038	117.437	6.92	High	High	High	High	High	High		99	101	0.16	0.16	98.9	98.8	99.1	101.1	101.2	100.9	1.18	0	112.62	20
YKT6	O15498	Synaptobrevin homolog YKT6 [OS=Homo sapiens]	0.977	0	22.3583	28.7879	6	14	6	1	198	22.403	6.92	High	High	High	High	High	High		98.8	101.2	2.24	2.19	98.3	97	101.3	101.7	103	98.7	2.162	0	41.1613	6
NIPSNAP1	Q9BPW8	Protein NipSnap homolog 1 [OS=Homo sapiens]	0.977	0	24.1526	22.8873	7	13	4	1	284	33.289	9.31	High	High	High	High	High	High		98.8	101.2	3.81	3.72		101.5	96.2		98.5	103.8	1.783	0	23.2904	7
GSTZ1	O43708	maleylacetoacetate isomerase [OS=Homo sapiens]	0.977	0.00228796	9.32638	10.6481	2	9	2	1	216	24.197	8.54	High	High	High	High	High	High		98.8	101.2	1.12	1.1	99.5	97.6	99.4	100.5	102.4	100.6	0.701	0	23.9072	2
ATXN3	P54252	Ataxin-3 [OS=Homo sapiens]	0.976	0.00228796	8.50734	8.79121	2	4	2	1	364	41.754	4.91	Not Found	High	High	Not Found	High	High		98.8	101.2	2.77	2.7		100.7	96.8		99.3	103.2	0.259	0	10.1517	2
PPIF	P30405	Peptidyl-prolyl cis-trans isomerase F, mitochondrial [OS=Homo sapiens]	0.975	0	17.5085	37.1981	7	25	5	1	207	22.026	9.38	High	High	High	High	High	High		98.7	101.3	1.41	1.37	99.1	99.9	97.2	100.9	100.1	102.8	2.162	1	62.4173	7
RMDN3	Q96TC7	Regulator of microtubule dynamics protein 3 [OS=Homo sapiens]	0.974	0.00228796	10.6419	7.65957	3	4	3	1	470	52.086	5.1	Not Found	High	High	Not Found	High	High		98.7	101.3	0.88	0.86		99.3	98.1		100.7	101.9	0.28	0	10.3499	3
PTRH2	Q9Y3E5	Peptidyl-tRNA hydrolase 2, mitochondrial [OS=Homo sapiens]	0.974	0	25.8532	48.6034	6	18	6	1	179	19.181	8.73	High	High	High	High	High	High		98.7	101.3	2.7	2.63	95.7	99.7	100.7	104.3	100.3	99.3	2.511	0	66.5662	6
YARS2	Q9Y2Z4	Tyrosine--tRNA ligase, mitochondrial [OS=Homo sapiens]	0.974	0.00431099	6.44616	6.28931	2	4	2	1	477	53.166	8.98	High	High	High	High	High	High		98.7	101.3	2.15	2.1	99.7	96.3	100.2	100.3	103.7	99.8	0.166	0	10.5127	2
ACOT7	O00154	cytosolic acyl coenzyme A thioester hydrolase [OS=Homo sapiens]	0.974	0	50.1304	25	8	39	8	1	380	41.769	8.54	High	High	High	High	High	High		98.7	101.3	0.53	0.51	98.9	98.1	99.1	101.1	101.9	100.9	2.511	0	119.488	8
AFG3L2	Q9Y4W6	AFG3-like protein 2 [OS=Homo sapiens]	0.974	0	66.6275	20.7026	17	35	17	1	797	88.528	8.66	High	High	High	High	High	High		98.7	101.3	0.37	0.36	99	98.7	98.3	101	101.3	101.7	1.448	0	91.0367	17
LRPPRC	P42704	Leucine-rich PPR motif-containing protein, mitochondrial [OS=Homo sapiens]	0.974	0	295.575	49.7131	62	239	62	1	1394	157.805	6.13	High	High	High	High	High	High		98.7	101.3	0.11	0.1	98.7	98.6	98.7	101.3	101.4	101.3	6.128	0	676.805	62
GSTK1	Q9Y2Q3-1	Glutathione S-transferase kappa 1 [OS=Homo sapiens]	0.974	0	37.7142	32.7434	7	23	7	1	226	25.48	8.41	High	High	High	High	High	High		98.7	101.3	1.04	1.01	98.5	97.8	99.8	101.5	102.2	100.2	2.981	0	71.5683	7
SFN	P31947-1	14-3-3 protein sigma [OS=Homo sapiens]	0.974	0	82.7124	73.7903	17	145	13	1	248	27.757	4.74	High	High	High	High	High	High		98.7	101.3	0.58	0.56	99.1	98.9	98	100.9	101.1	102	20.544	0	429.59	17
NDUFAB1	O14561	Acyl carrier protein, mitochondrial [OS=Homo sapiens]	0.973	0	12.9868	18.5897	3	14	3	1	156	17.406	4.93	High	High	High	High	High	High		98.6	101.4	0.9	0.87	99.6	98.1	98.1	100.4	101.9	101.9	2.162	0	38.6475	3
ACAD9	Q9H845	Acyl-CoA dehydrogenase family member 9, mitochondrial [OS=Homo sapiens]	0.973	0	43.274	23.8325	11	29	11	1	621	68.717	7.96	High	High	High	High	High	High		98.6	101.4	0.42	0.41	98.6	99	98.2	101.4	101	101.8	0.962	0	72.2556	11
MPG	P29372	DNA-3-methyladenine glycosylase [OS=Homo sapiens]	0.972	0.00228796	10.7402	12.7517	3	8	3	1	298	32.848	9.57	High	High	High	High	High	High		98.6	101.4	3.43	3.33	96.7	96.6	102.5	103.3	103.4	97.5	0.501	0	23.2606	3
DCTPP1	Q9H773	dCTP pyrophosphatase 1 [OS=Homo sapiens]	0.972	0	37.5895	57.6471	7	40	7	1	170	18.669	5.03	High	High	High	High	High	High		98.6	101.4	4.87	4.74	102.1	100.6	93.1	97.9	99.4	106.9	7.111	0	104.567	7
NDUFB9	Q9Y6M9	NADH dehydrogenase [ubiquinone] 1 beta subcomplex subunit 9 [OS=Homo sapiens]	0.971	0.00487211	5.15729	10.0559	2	3	2	1	179	21.817	8.38	High	High	High	High	High	High		98.5	101.5	11.32	10.99		106.4	90.6		93.6	109.4	0.585	0	6.38355	2
PPP2R1A	P30153	serine/threonine-protein phosphatase 2A 65 kDa regulatory subunit A alpha isoform [OS=Homo sapiens]	0.971	0	127.156	44.9915	24	119	18	1	589	65.267	5.11	High	High	High	High	High	High		98.5	101.5	1.22	1.19	97.1	99.1	99.3	102.9	100.9	100.7	6.444	5	354.309	24
HSD17B10	Q99714-1	3-hydroxyacyl-CoA dehydrogenase type-2 [OS=Homo sapiens]	0.971	0	108.667	70.8812	13	87	13	1	261	26.906	7.78	High	High	High	High	High	High		98.5	101.5	0.7	0.68	99	97.8	98.8	101	102.2	101.2	22.714	0	300.258	13
UBA52	P62987	Ubiquitin-60S ribosomal protein L40 [OS=Homo sapiens]	0.97	0	54.2309	58.5938	8	182	1	1	128	14.719	9.83	High	High	High	High	High	High		98.5	101.5	8.87	8.61	90.1	97.8	107.6	109.9	102.2	92.4	58.948	0	502.621	8
OPA1	O60313-2	Isoform 2 of Dynamin-like 120 kDa protein, mitochondrial [OS=Homo sapiens]	0.969	0	86.119	22.5677	20	48	20	1	997	115.812	7.87	High	High	High	High	High	High		98.4	101.6	1.26	1.22	97.3	98.3	99.7	102.7	101.7	100.3	1.381	0	133.996	20
ARMCX3	Q9UH62	Armadillo repeat-containing X-linked protein 3 [OS=Homo sapiens]	0.968	0.00445001	5.77393	4.74934	2	3	2	1	379	42.474	8.37	High	High	High	High	High	High		98.4	101.6	3.31	3.21		96.1	100.7		103.9	99.3	0.259	0	3.83791	2
CPOX	P36551	Oxygen-dependent coproporphyrinogen-III oxidase, mitochondrial [OS=Homo sapiens]	0.968	0	16.4146	14.0969	5	8	5	1	454	50.12	8.25	High	High	High	High	High	High		98.4	101.6	1.4	1.36	98.4	97	99.8	101.6	103	100.2	0.468	0	19.1739	5
ME1	P48163	NADP-dependent malic enzyme [OS=Homo sapiens]	0.968	0	24.1721	16.7832	8	14	8	1	572	64.109	6.13	High	High	High	High	High	High		98.4	101.6	2.67	2.59	101.4	96.5	97.3	98.6	103.5	102.7	0.778	0	33.7584	8
ADPRHL2	Q9NX46	Poly(ADP-ribose) glycohydrolase ARH3 [OS=Homo sapiens]	0.968	0	13.0274	12.6722	4	7	4	1	363	38.922	5.07	High	High	High	High	High	High		98.4	101.6	3.03	2.94	100.2	94.9	99.9	99.8	105.1	100.1	0.668	0	16.0386	4
SLC25A13	Q9UJS0-2	Isoform 2 of Calcium-binding mitochondrial carrier protein Aralar2 [OS=Homo sapiens]	0.968	0	54.1803	20.1183	12	35	6	1	676	74.257	8.62	High	High	High	High	High	High		98.4	101.6	0.48	0.46	98.9	98.3	98	101.1	101.7	102	1.482	6	104.026	12
SLC25A6	P12236	ADP/ATP translocase 3 [OS=Homo sapiens]	0.967	0	99.2447	53.3557	16	224	5	1	298	32.845	9.74	High	High	High	High	High	High		98.3	101.7	0.82	0.79	98.3	97.5	99.2	101.7	102.5	100.8	15.876	0	656.93	16
NMT1	P30419	glycylpeptide N-tetradecanoyltransferase 1 [OS=Homo sapiens]	0.967	0	50.9097	27.621	11	32	10	1	496	56.77	7.8	High	High	High	High	High	High		98.3	101.7	2.31	2.23	96.2	98.2	100.7	103.8	101.8	99.3	2.455	1	93.4731	11
DHX36	Q9H2U1	ATP-dependent RNA helicase DHX36 [OS=Homo sapiens]	0.967	0.0038373	6.98195	3.27381	2	2	2	1	1008	114.688	7.68	Not Found	High	High	Not Found	High	High		98.3	101.7	2.84	2.75		96.3	100.3		103.7	99.7	0.081	0	3.32484	2
CCAR2	Q8N163-1	Cell cycle and apoptosis regulator protein 2 [OS=Homo sapiens]	0.967	0	75.3704	28.169	21	40	21	1	923	102.838	5.22	High	High	High	High	High	High		98.3	101.7	0.54	0.52	98.2	97.9	98.9	101.8	102.1	101.1	1.619	0	103.68	21
IDE	P14735	insulin-degrading enzyme [OS=Homo sapiens]	0.966	0	76.6416	20.5103	19	52	19	1	1019	117.893	6.61	High	High	High	High	High	High		98.3	101.7	0.25	0.24	98	98.4	98.4	102	101.6	101.6	1.235	0	146.514	19
DDAH2	O95865	N(G),N(G)-dimethylarginine dimethylaminohydrolase 2 [OS=Homo sapiens]	0.966	0.00354884	7.45597	6.31579	2	4	2	1	285	29.625	6.01	High	High	High	High	High	High		98.3	101.7	3.21	3.1	94.7	99.5	100.6	105.3	100.5	99.4	0.311	0	11.6643	2
PPP3R1	P63098	Calcineurin subunit B type 1 [OS=Homo sapiens]	0.966	0	22.1957	29.4118	4	16	4	1	170	19.288	4.81	High	High	High	High	High	High		98.3	101.7	1.57	1.51	99.9	97.9	96.9	100.1	102.1	103.1	2.981	0	43.2443	4
LYN	P07948-1	Tyrosine-protein kinase Lyn [OS=Homo sapiens]	0.966	0.00228796	9.26177	5.27344	3	5	1	1	512	58.537	7.11	High	Not Found	High	High	Not Found	High		98.3	101.7	2.22	2.14	96.7		99.8	103.3		100.2	0.233	0	13.6671	3
TIGAR	Q9NQ88	Fructose-2,6-bisphosphatase TIGAR [OS=Homo sapiens]	0.964	0.00228796	8.64681	12.963	2	5	2	1	270	30.043	7.69	High	High	High	High	High	High		98.1	101.9	0.62	0.59	98.7	98.2	97.5	101.3	101.8	102.5	0.359	0	21.3533	2
HTRA2	O43464	Serine protease HTRA2, mitochondrial [OS=Homo sapiens]	0.963	0.00354884	7.23414	4.80349	2	3	2	1	458	48.811	10.07	Not Found	High	High	Not Found	High	High		98.1	101.9	1.36	1.31		99.1	97.2		100.9	102.8	0.186	0	7.69728	2
BDH1	Q02338	D-beta-hydroxybutyrate dehydrogenase, mitochondrial [OS=Homo sapiens]	0.962	0	20.8631	18.0758	5	10	5	1	343	38.132	8.95	High	High	High	High	High	High		98.1	101.9	1.64	1.58	97.9	99.8	96.6	102.1	100.2	103.4	0.823	0	23.6938	5
PMPCA	Q10713	Mitochondrial-processing peptidase subunit alpha [OS=Homo sapiens]	0.962	0	23.8305	12.9524	6	16	6	1	525	58.216	6.92	High	High	High	High	High	High		98.1	101.9	0.91	0.88	97.3	97.9	99	102.7	102.1	101	0.682	0	37.7693	6
TRNT1	Q96Q11-1	CCA tRNA nucleotidyltransferase 1, mitochondrial [OS=Homo sapiens]	0.962	0	21.3584	17.0507	7	14	7	1	434	50.096	8.1	High	High	High	High	High	High		98.1	101.9	5.3	5.1	102.7	99	92.5	97.3	101	107.5	0.812	0	31.0551	7
OAS1	P00973-3	Isoform p48 of 2'-5'-oligoadenylate synthase 1 [OS=Homo sapiens]	0.961	0	25.1924	15.4589	5	14	5	1	414	47.377	8.95	High	High	High	High	High	High		98	102	3.64	3.49	94	100.8	99.2	106	99.2	100.8	1.081	0	29.6421	5
ILF3	Q12906-7	Isoform 7 of Interleukin enhancer-binding factor 3 [OS=Homo sapiens]	0.961	0	191.849	41.0913	33	205	27	1	898	95.748	8.81	High	High	High	High	High	High		98	102	0.11	0.11	98.1	97.9	97.9	101.9	102.1	102.1	12.503	4	586.094	33
CLIC4	Q9Y696	Chloride intracellular channel protein 4 [OS=Homo sapiens]	0.96	0	38.8676	39.9209	9	25	9	1	253	28.754	5.59	High	High	High	High	High	High		98	102	2.64	2.54	95.2	98.3	100.4	104.8	101.7	99.6	3.437	0	61.9169	9
XPC	Q01831	DNA repair protein complementing XP-C cells [OS=Homo sapiens]	0.96	0.00445001	5.67693	2.65957	2	3	2	1	940	105.887	8.9	Not Found	High	High	Not Found	High	High		97.9	102.1	1.78	1.71		99.2	96.7		100.8	103.3	0.103	0	5.91966	2
PDHB	P11177	Pyruvate dehydrogenase E1 component subunit beta, mitochondrial [OS=Homo sapiens]	0.96	0	58.9703	35.6546	10	38	10	1	359	39.208	6.65	High	High	High	High	High	High		97.9	102.1	0.38	0.36	97.5	98.2	98.1	102.5	101.8	101.9	5.813	0	115.38	10
MRPL49	Q13405	39S ribosomal protein L49, mitochondrial [OS=Homo sapiens]	0.959	0.00228796	11.0076	22.2892	3	5	3	1	166	19.186	9.45	High	High	High	High	High	High		97.9	102.1	3.23	3.1	101.4	95.2	97.2	98.6	104.8	102.8	0.585	0	13.3858	3
LGALS3	P17931	Galectin-3 [OS=Homo sapiens]	0.959	0	48.9001	43.6	10	48	10	1	250	26.136	8.56	High	High	High	High	High	High		97.9	102.1	1.3	1.24	96.7	99.2	97.9	103.3	100.8	102.1	22.101	0	119.537	10
PIN1	Q13526	peptidyl-prolyl cis-trans isomerase NIMA-interacting 1 [OS=Homo sapiens]	0.959	0	14.1484	30.6748	4	10	4	1	163	18.232	8.82	High	High	High	High	High	High		97.9	102.1	1.3	1.25	99	96.5	98.2	101	103.5	101.8	1.31	0	33.3676	4
DNAJC11	Q9NVH1-1	DnaJ homolog subfamily C member 11 [OS=Homo sapiens]	0.958	0	13.2921	7.33453	4	9	4	1	559	63.239	8.4	High	High	High	High	High	High		97.9	102.1	1.15	1.1	98.9	96.7	98	101.1	103.3	102	0.346	0	23.3037	4
FKBP8	Q14318-2	Isoform 2 of Peptidyl-prolyl cis-trans isomerase FKBP8 [OS=Homo sapiens]	0.958	0	32.0688	20.339	7	20	7	1	413	44.621	4.84	High	High	High	High	High	High		97.9	102.1	1.51	1.45	99.5	96.5	97.6	100.5	103.5	102.4	1.683	0	62.7516	7
DTYMK	P23919	thymidylate kinase [OS=Homo sapiens]	0.957	0	28.6196	41.9811	9	18	9	1	212	23.804	8.27	High	High	High	High	High	High		97.8	102.2	1.35	1.29	99.2	97.7	96.6	100.8	102.3	103.4	1.783	0	50.1528	9
CKMT1A; CKMT1B	P12532	Creatine kinase U-type, mitochondrial [OS=Homo sapiens]	0.956	0	44.2145	40.048	10	28	10	1	417	47.007	8.34	High	High	High	High	High	High		97.8	102.2	0.84	0.81	98.1	98.4	96.8	101.9	101.6	103.2	2.3	0	75.3901	10
PPP2CA	P67775	Serine/threonine-protein phosphatase 2A catalytic subunit alpha isoform [OS=Homo sapiens]	0.956	0	57.4553	43.6893	11	53	10	1	309	35.571	5.54	High	High	High	High	High	High		97.7	102.3	0.98	0.94	97.9	98.6	96.7	102.1	101.4	103.3	5.158	1	164.048	11
HIP1R	O75146	Huntingtin-interacting protein 1-related protein [OS=Homo sapiens]	0.956	0.00439754	6.23396	2.52809	2	2	2	1	1068	119.315	6.67	Not Found	High	High	Not Found	High	High		97.7	102.3	1.6	1.53		98.8	96.6		101.2	103.4	0.062	0	2.67191	2
MRPL46	Q9H2W6	39S ribosomal protein L46, mitochondrial [OS=Homo sapiens]	0.956	0.0038373	7.00351	8.60215	3	6	3	1	279	31.685	7.05	High	High	High	High	High	High		97.7	102.3	1.8	1.72	96.5	99		103.5	101		0.438	0	10.5964	3
LIG1	P18858	DNA ligase 1 [OS=Homo sapiens]	0.955	0	72.8806	27.5299	20	41	20	1	919	101.673	5.62	High	High	High	High	High	High		97.7	102.3	1.07	1.02	97.2	98.9	97	102.8	101.1	103	1.512	0	107.705	20
PUS1	Q9Y606	tRNA pseudouridine synthase A, mitochondrial [OS=Homo sapiens]	0.955	0	28.1615	23.185	9	14	9	1	427	47.44	8.41	High	High	High	High	High	High		97.7	102.3	8.82	8.42	97.1	89.4	106.6	102.9	110.6	93.4	0.911	0	35.7287	9
BID	P55957-2	Isoform 2 of BH3-interacting domain death agonist [OS=Homo sapiens]	0.955	0	22.7457	23.2365	3	13	3	1	241	26.819	7.08	High	High	High	High	High	High		97.7	102.3	2.26	2.16	99.2	95.2	98.8	100.8	104.8	101.2	1.61	0	38.5183	3
LIG3	P49916-1	DNA ligase 3 [OS=Homo sapiens]	0.955	0	12.5451	5.05451	5	6	5	1	1009	112.835	9.01	High	High	High	High	High	High		97.7	102.3	6.03	5.76	103.4	91.6	98	96.6	108.4	102	0.184	0	14.873	5
PC	P11498	pyruvate carboxylase, mitochondrial [OS=Homo sapiens]	0.953	0.00228796	8.0819	3.48048	4	4	4	1	1178	129.551	6.84	High	Not Found	High	High	Not Found	High		97.6	102.4	3.5	3.34	100		95.2	100		104.8	0.134	0	8.90502	4
GTF3C4	Q9UKN8	General transcription factor 3C polypeptide 4 [OS=Homo sapiens]	0.953	0.00228796	11.1268	5.23114	5	5	5	1	822	91.923	6.65	High	Not Found	High	High	Not Found	High		97.6	102.4	0.85	0.81	98.2		97	101.8		103	0.215	0	11.7109	5
ACSL3	O95573	long-chain-fatty-acid--CoA ligase 3 [OS=Homo sapiens]	0.952	0	20.7554	14.3056	7	22	5	1	720	80.368	8.38	High	High	High	High	High	High		97.5	102.5	1.45	1.38	99.1	96.8	96.6	100.9	103.2	103.4	0.413	0	57.7184	7
PIN4	Q9Y237-2	Isoform 2 of Peptidyl-prolyl cis-trans isomerase NIMA-interacting 4 [OS=Homo sapiens]	0.952	0	21.7479	39.7436	5	10	5	1	156	16.598	9.96	High	High	High	High	High	High		97.5	102.5	2.92	2.78	100.8	95.9	95.9	99.2	104.1	104.1	2.981	0	20.5352	5
MAP2K2	P36507	Dual specificity mitogen-activated protein kinase kinase 2 [OS=Homo sapiens]	0.951	0	30.5542	24.75	10	27	4	1	400	44.396	6.55	High	High	High	High	High	High		97.5	102.5	0.85	0.8	97.8	98.1	96.5	102.2	101.9	103.5	2.34	6	64.3045	10
HEATR1	Q9H583	HEAT repeat-containing protein 1 [OS=Homo sapiens]	0.951	0	34.9388	5.17724	10	18	10	1	2144	242.215	6.54	High	High	High	High	High	High		97.5	102.5	1.8	1.71	98.8	98.1	95.5	101.2	101.9	104.5	0.233	0	43.5179	10
FUNDC2	Q9BWH2	FUN14 domain-containing protein 2 [OS=Homo sapiens]	0.95	0.00228796	9.37631	11.6402	3	4	3	1	189	20.663	9.73	High	High	Not Found	High	High	Not Found		97.5	102.5	5.62	5.34	101.3	93.6		98.7	106.4		0.995	0	9.65039	3
QARS	P47897	glutamine--tRNA ligase [OS=Homo sapiens]	0.95	0	91.0358	30.9677	21	60	20	1	775	87.743	7.15	High	High	High	High	High	High		97.4	102.6	0.07	0.07	97.4	97.4	97.5	102.6	102.6	102.5	2.234	0	172.316	21
DHRS4	Q9BTZ2	dehydrogenase/reductase sdr family member 4 [OS=Homo sapiens]	0.95	0.00228796	10.6065	8.63309	3	6	3	1	278	29.518	8.56	High	High	High	High	High	High		97.4	102.6	0.18	0.17	97.3		97.6	102.7		102.4	0.668	0	17.2098	3
FEN1	P39748	Flap endonuclease 1 [OS=Homo sapiens]	0.95	0	74.0542	45.5263	13	72	13	1	380	42.566	8.62	High	High	High	High	High	High		97.4	102.6	0.91	0.86	97.6	98.2	96.4	102.4	101.8	103.6	5.19	0	222.214	13
IFIT3	O14879	Interferon-induced protein with tetratricopeptide repeats 3 [OS=Homo sapiens]	0.948	0	43.7683	22.6531	10	29	10	1	490	55.95	5.2	High	High	High	High	High	High		97.3	102.7	1.36	1.29	98.9	96.5	96.7	101.1	103.5	103.3	1.626	0	78.705	10
IMMT	Q16891-2	Isoform 2 of MICOS complex subunit MIC60 [OS=Homo sapiens]	0.948	0	160.925	48.7282	31	104	2	1	747	82.574	6.57	Not Found	High	Not Found	Not Found	High	Not Found		97.3	102.7	0.8	0.76	96.4	97.8	97.7	103.6	102.2	102.3	5.476	28	328.408	31
AKAP1	Q92667	A-kinase anchor protein 1, mitochondrial [OS=Homo sapiens]	0.947	0	22.5519	9.30233	6	15	6	1	903	97.281	4.94	High	High	High	High	High	High		97.3	102.7	1.57	1.49	98.8	97.3	95.8	101.2	102.7	104.2	0.334	0	39.6024	6
TXNRD1	Q16881-1	Thioredoxin reductase 1, cytoplasmic [OS=Homo sapiens]	0.947	0	41.8448	16.0247	10	24	10	1	649	70.862	7.39	High	High	High	High	High	High		97.3	102.7	2.48	2.35	99.6	94.8	97.4	100.4	105.2	102.6	1.198	0	64.4782	10
ELAC2	Q9BQ52-1	Zinc phosphodiesterase ELAC protein 2 [OS=Homo sapiens]	0.946	0	29.7813	13.3172	9	16	9	1	826	92.16	7.9	High	High	High	High	High	High		97.2	102.8	1.1	1.04	98.4	97	96.3	101.6	103	103.7	0.571	0	37.255	9
GOLPH3	Q9H4A6	Golgi phosphoprotein 3 [OS=Homo sapiens]	0.945	0	23.5465	21.8121	5	12	5	1	298	33.79	6.44	High	High	High	High	High	High		97.2	102.8	0.89	0.84	96.2	97.7	97.6	103.8	102.3	102.4	1.448	0	33.3467	5
MAP2K1	Q02750	Dual specificity mitogen-activated protein kinase kinase 1 [OS=Homo sapiens]	0.944	0	36.1729	27.7354	10	31	4	1	393	43.411	6.62	High	High	High	High	High	High		97.1	102.9	1.31	1.24	98.3	97.3	95.8	101.7	102.7	104.2	2.728	0	77.0598	10
PPL	O60437	periplakin [OS=Homo sapiens]	0.943	0	30.4869	6.83371	10	16	10	1	1756	204.623	5.6	High	High	High	High	High	High		97.1	102.9	2.31	2.18	94.8	99.3	97.1	105.2	100.7	102.9	0.186	0	30.8163	10
PLA2G4A	P47712	Cytosolic phospholipase A2 [OS=Homo sapiens]	0.943	0	12.0682	4.53939	4	7	4	1	749	85.184	5.38	High	High	High	High	High	High		97.1	102.9	0.61	0.58	97.7	96.9	96.6	102.3	103.1	103.4	0.274	0	16.6566	4
SDHA	P31040	Succinate dehydrogenase [ubiquinone] flavoprotein subunit, mitochondrial [OS=Homo sapiens]	0.943	0	45.1611	20.6325	11	28	11	1	664	72.645	7.39	High	High	High	High	High	High		97	103	1.82	1.72	99.1	95.9	96.1	100.9	104.1	103.9	1.246	0	59.5488	11
NOL6	Q9H6R4-1	Nucleolar protein 6 [OS=Homo sapiens]	0.943	0	24.8591	7.59162	6	13	6	1	1146	127.513	7.64	High	High	High	High	High	High		97	103	1.26	1.19	95.6	97.6	97.9	104.4	102.4	102.1	0.32	0	30.8981	6
UQCRFS1P1	P0C7P4	Putative cytochrome b-c1 complex subunit Rieske-like protein 1 [OS=Homo sapiens]	0.942	0	16.7724	11.6608	5	17	5	1	283	30.796	8.87	High	High	High	High	High	High		97	103	2.33	2.19	95.9	99.6	95.5	104.1	100.4	104.5	1.581	0	43.324	5
ALDH6A1	Q02252	Methylmalonate-semialdehyde dehydrogenase [acylating], mitochondrial [OS=Homo sapiens]	0.942	0	25.2567	11.215	6	14	6	1	535	57.803	8.5	High	High	High	High	High	High		97	103	1.21	1.14	97.6	97.8	95.7	102.4	102.2	104.3	0.719	0	37.3715	6
PDHA1	P08559-4	Isoform 4 of Pyruvate dehydrogenase E1 component subunit alpha, somatic form, mitochondrial [OS=Homo sapiens]	0.941	0	49.7425	24.7664	11	35	11	1	428	47.549	8.54	High	High	High	High	High	High		97	103	0.25	0.23	96.8	97.3	96.9	103.2	102.7	103.1	2.162	0	100.329	11
ANXA1	P04083	annexin A1 [OS=Homo sapiens]	0.94	0	53.6863	39.5954	11	47	11	1	346	38.69	7.02	High	High	High	High	High	High		96.9	103.1	0.42	0.39	96.4	97.2	97.1	103.6	102.8	102.9	3.16	0	119.069	11
ALDH18A1	P54886	delta-1-pyrroline-5-carboxylate synthase [OS=Homo sapiens]	0.939	0	70.3455	23.3962	17	38	17	1	795	87.248	7.12	High	High	High	High	High	High		96.9	103.1	0.24	0.23	96.8	96.7	97.1	103.2	103.3	102.9	1.63	0	100.949	17
AKT1	P31749	RAC-alpha serine/threonine-protein kinase [OS=Homo sapiens]	0.939	0	27.9524	17.0833	8	17	6	1	480	55.651	6.07	High	High	High	High	High	High		96.8	103.2	3.28	3.08	97.2	99.8	93.5	102.8	100.2	106.5	0.808	2	40.4467	8
TIMM44	O43615	Mitochondrial import inner membrane translocase subunit TIM44 [OS=Homo sapiens]	0.938	0	54.9215	36.5044	15	39	15	1	452	51.323	8.32	High	High	High	High	High	High		96.8	103.2	1.6	1.5	95.9	98.6	95.9	104.1	101.4	104.1	2.282	0	98.6543	15
PPP3CA	Q08209-2	Isoform 2 of Serine/threonine-protein phosphatase 2B catalytic subunit alpha isoform [OS=Homo sapiens]	0.938	0	26.8641	16.047	8	23	7	1	511	57.622	6.3	High	High	High	High	High	High		96.8	103.2	0.9	0.85	96.8	97.7	95.9	103.2	102.3	104.1	1.043	0	58.041	8
SDHC	Q99643	Succinate dehydrogenase cytochrome b560 subunit, mitochondrial [OS=Homo sapiens]	0.937	0.00439754	6.31317	12.426	2	3	2	1	169	18.598	9.69	High	High	Not Found	High	High	Not Found		96.8	103.2	2.03	1.9	95.4	98.1		104.6	101.9		0.668	0	8.82811	2
PCK2	Q16822-1	Phosphoenolpyruvate carboxykinase [GTP], mitochondrial [OS=Homo sapiens]	0.937	0	72.1615	28.75	14	43	14	1	640	70.685	7.62	High	High	High	High	High	High		96.8	103.2	10	9.38	85.6	101.4	103.2	114.4	98.6	96.8	1.985	0	127.301	14
MRPS36	P82909	28S ribosomal protein S36, mitochondrial [OS=Homo sapiens]	0.935	0	12.8702	53.3981	4	6	4	1	103	11.459	9.99	High	High	High	High	High	High		96.7	103.3	2.21	2.06	94.4	96.9	98.6	105.6	103.1	101.4	3.642	0	18.2617	4
EMC8	O43402	ER membrane protein complex subunit 8 [OS=Homo sapiens]	0.935	0	12.6344	19.5238	3	6	3	1	210	23.758	6.4	High	High	High	High	High	High		96.7	103.3	1.1	1.03	96.7	97.7	95.6	103.3	102.3	104.4	0.701	0	22.6207	3
PYCR1	P32322-3	Isoform 3 of Pyrroline-5-carboxylate reductase 1, mitochondrial [OS=Homo sapiens]	0.935	0	30.3903	23.4104	6	16	5	1	346	35.958	7.61	High	High	High	High	High	High		96.7	103.3	2.17	2.03	97.4	98.3	94.3	102.6	101.7	105.7	1.448	1	45.3695	6
ATP5MG	O75964	ATP synthase subunit g, mitochondrial [OS=Homo sapiens]	0.934	0	16.9206	33.0097	4	13	4	1	103	11.421	9.64	High	High	High	High	High	High		96.6	103.4	0.92	0.86	97.1	97.1	95.6	102.9	102.9	104.4	3.217	0	37.0752	4
RANBP2	P49792	E3 SUMO-protein ligase RanBP2 [OS=Homo sapiens]	0.933	0	95.0567	13.0583	31	56	30	1	3224	357.974	6.2	High	High	High	High	High	High		96.5	103.5	3.9	3.64	98.9	98.5	92.2	101.1	101.5	107.8	0.413	1	126.832	31
GPX4	P36969	Phospholipid hydroperoxide glutathione peroxidase, mitochondrial [OS=Homo sapiens]	0.933	0	12.2687	19.2893	4	4	4	1	197	22.161	8.37	Not Found	High	High	Not Found	High	High		96.5	103.5	1.36	1.27		97.5	95.6		102.5	104.4	0.848	0	11.3963	4
MRRF	Q96E11	Ribosome-recycling factor, mitochondrial [OS=Homo sapiens]	0.933	0.00228796	9.38098	10.3053	3	6	3	1	262	29.259	9.79	High	High	High	High	High	High		96.5	103.5	2.32	2.16	98.3	97.2	94	101.7	102.8	106	0.54	0	16.4839	3
SFXN1	Q9H9B4	Sideroflexin-1 [OS=Homo sapiens]	0.933	0	63.7367	49.3789	11	44	10	1	322	35.596	9.07	High	High	High	High	High	High		96.5	103.5	4.94	4.61	99.6	99	91	100.4	101	109	6.079	1	118.834	11
GSK3B	P49841-2	Isoform 2 of Glycogen synthase kinase-3 beta [OS=Homo sapiens]	0.933	0	23.7876	18.4758	6	12	4	1	433	48.004	8.78	High	High	High	High	High	High		96.6	103.4	0.53	0.5	96	96.8	96.9	104	103.2	103.1	0.905	2	26.7446	6
CYB5R1	Q9UHQ9	NADH-cytochrome b5 reductase 1 [OS=Homo sapiens]	0.932	0.00354884	7.2699	9.83607	2	4	2	1	305	34.073	9.38	High	High	High	High	High	High		96.5	103.5	1.09	1.02		97.2	95.7		102.8	104.3	0.259	0	11.878	2
DNAJA3	Q96EY1-1	DnaJ homolog subfamily A member 3, mitochondrial [OS=Homo sapiens]	0.932	0	20.2886	16.4583	6	12	6	1	480	52.456	9.26	High	High	High	High	High	High		96.5	103.5	2.91	2.71	97.1	98.9	93.4	102.9	101.1	106.6	0.859	0	28.3747	6
ATP5MF	P56134	ATP synthase subunit f, mitochondrial [OS=Homo sapiens]	0.931	0	17.3189	31.9149	3	10	2	1	94	10.911	9.67	High	High	High	High	High	High		96.4	103.6	0.56	0.52	97	96.2	96	103	103.8	104	16.783	0	26.8812	3
MBOAT7	Q96N66-1	Lysophospholipid acyltransferase 7 [OS=Homo sapiens]	0.929	0	24.0347	14.8305	6	15	6	1	472	52.73	8.97	High	High	High	High	High	High		96.3	103.7	1.5	1.4	95.6	95.4	98	104.4	104.6	102	0.874	0	43.1735	6
COA3	Q9Y2R0	Cytochrome c oxidase assembly factor 3 homolog, mitochondrial [OS=Homo sapiens]	0.927	0.00228796	8.44395	17.9245	2	5	2	1	106	11.724	9.6	High	High	High	High	High	High		96.2	103.8	1.54	1.43	97.6	94.7	96.4	102.4	105.3	103.6	1.154	0	14.8485	2
STAT3	P40763	Signal transducer and activator of transcription 3 [OS=Homo sapiens]	0.927	0	12.5141	6.49351	4	9	4	1	770	88.011	6.3	High	High	High	High	High	High		96.2	103.8	0.56	0.52	96.8	95.8	96	103.2	104.2	104	0.216	0	26.2997	4
DDX21	Q9NR30-1	Nucleolar RNA helicase 2 [OS=Homo sapiens]	0.927	0	211.832	42.9119	31	200	29	1	783	87.29	9.28	High	High	High	High	High	High		96.2	103.8	0.5	0.46	96.4	96.5	95.6	103.6	103.5	104.4	14.199	2	642.225	31
PNPT1	Q8TCS8	Polyribonucleotide nucleotidyltransferase 1, mitochondrial [OS=Homo sapiens]	0.924	0	47.9131	19.7957	12	25	12	1	783	85.897	7.77	High	High	High	High	High	High		96.1	103.9	2.35	2.17	97.5	97.2	93.5	102.5	102.8	106.5	0.837	0	69.9857	12
NRDC	O43847-2	Isoform 2 of Nardilysin [OS=Homo sapiens]	0.924	0	37.9911	8.53859	10	26	10	1	1218	139.196	5.01	High	High	High	High	High	High		96.1	103.9	1.33	1.23	95.6	97.5	95.1	104.4	102.5	104.9	0.572	0	62.7041	10
COX5B	P10606	Cytochrome c oxidase subunit 5B, mitochondrial [OS=Homo sapiens]	0.923	0	30.8555	45.7364	6	32	6	1	129	13.687	8.81	High	High	High	High	High	High		96	104	0.02	0.02	96	96	96	104	104	104	6.943	0	88.7812	6
IDH2	P48735	Isocitrate dehydrogenase [NADP], mitochondrial [OS=Homo sapiens]	0.922	0	133.126	59.9558	24	153	22	1	452	50.877	8.69	High	High	High	High	High	High		95.9	104.1	0.21	0.2	96.2	95.8	95.8	103.8	104.2	104.2	13.497	2	434.036	24
UQCRC2	P22695	Cytochrome b-c1 complex subunit 2, mitochondrial [OS=Homo sapiens]	0.921	0	76.8717	37.0861	15	53	15	1	453	48.413	8.63	High	High	High	High	High	High		95.9	104.1	0.48	0.44	95.4	96.1	96.3	104.6	103.9	103.7	5.918	0	163.799	15
PMPCB	O75439	mitochondrial-processing peptidase subunit beta [OS=Homo sapiens]	0.92	0	55.0558	27.8119	11	23	10	1	489	54.331	6.83	High	High	High	High	High	High		95.8	104.2	0.73	0.68	96.6	95.4	95.5	103.4	104.6	104.5	2.433	0	65.5157	11
GCDH	Q92947-1	Glutaryl-CoA dehydrogenase, mitochondrial [OS=Homo sapiens]	0.92	0	12.8706	12.3288	5	11	5	1	438	48.096	8.06	High	High	High	High	High	High		95.8	104.2	0.62	0.57	96	96.3	95.2	104	103.7	104.8	0.585	0	18.9587	5
BCAP31	P51572-2	Isoform 2 of B-cell receptor-associated protein 31 [OS=Homo sapiens]	0.918	0	79.9866	34.1853	17	57	17	1	313	34.73	7.84	High	High	High	High	High	High		95.7	104.3	1.11	1.02	96.2	96.4	94.5	103.8	103.6	105.5	13.384	0	167.437	17
OGT	O15294	UDP-N-acetylglucosamine--peptide N-acetylglucosaminyltransferase 110 kDa subunit [OS=Homo sapiens]	0.915	0	29.5801	10.1338	9	12	9	1	1046	116.85	6.7	High	High	High	High	High	High		95.5	104.5	2.38	2.17	94.3	94.2	98.2	105.7	105.8	101.8	0.468	0	26.2406	9
IDH3B	O43837-1	isocitrate dehydrogenase [NAD] subunit beta, mitochondrial [OS=Homo sapiens]	0.915	0	36.5357	30.6494	9	32	9	1	385	42.157	8.46	High	High	High	High	High	High		95.6	104.4	1.06	0.97	96	94.4	96.3	104	105.6	103.7	2.325	0	62.6788	9
CYC1	P08574	Cytochrome c1, heme protein, mitochondrial [OS=Homo sapiens]	0.913	0	11.6248	14.1538	4	9	4	1	325	35.399	9	High	High	High	High	High	High		95.4	104.6	1.45	1.32	95.6	96.7	94	104.4	103.3	106	0.624	0	18.0127	4
L2HGDH	Q9H9P8-1	L-2-hydroxyglutarate dehydrogenase, mitochondrial [OS=Homo sapiens]	0.913	0	19.7192	16.1987	6	10	6	1	463	50.284	8.15	High	High	High	High	High	High		95.4	104.6	2.2	2.01	94.8	93.7	97.8	105.2	106.3	102.2	0.61	0	30.4664	6
DLD	P09622	Dihydrolipoyl dehydrogenase, mitochondrial [OS=Homo sapiens]	0.912	0	93.8331	35.3635	14	67	14	1	509	54.143	7.85	High	High	High	High	High	High		95.4	104.6	1.4	1.28	94.3	95	96.9	105.7	105	103.1	4.843	0	198.341	14
BSG	P35613	Basigin [OS=Homo sapiens]	0.911	0	43.5859	28.3117	10	31	10	1	385	42.174	5.66	High	High	High	High	High	High		95.4	104.6	1.18	1.08	96.6	94.5	94.9	103.4	105.5	105.1	2.548	0	80.5001	10
PARP9	Q8IXQ6	Poly [ADP-ribose] polymerase 9 [OS=Homo sapiens]	0.911	0	18.4388	6.67447	6	10	6	1	854	96.281	7.91	High	High	High	High	High	High		95.3	104.7	3.72	3.38	98.9	91.8	95.3	101.1	108.2	104.7	0.304	0	21.6579	6
ACADVL	P49748-3	Isoform 3 of Very long-chain specific acyl-CoA dehydrogenase, mitochondrial [OS=Homo sapiens]	0.911	0	72.1004	31.7109	15	42	15	1	678	72.881	8.75	High	High	High	High	High	High		95.3	104.7	1.12	1.02	96	95.9	94.1	104	104.1	105.9	1.783	0	121.006	15
CLPB	Q9H078-1	Caseinolytic peptidase B protein homolog [OS=Homo sapiens]	0.909	0	30.2543	14.1443	9	15	9	1	707	78.68	9.01	High	High	High	High	High	High		95.3	104.7	2.89	2.63	92.1	96.8	96.9	107.9	103.2	103.1	0.638	0	35.9485	9
TIMM8A	O60220	Mitochondrial import inner membrane translocase subunit Tim8 A [OS=Homo sapiens]	0.907	0.00228796	11.452	22.6804	2	9	2	1	97	10.991	5.16	High	High	High	High	High	High		95.1	104.9	1.13	1.02	93.9	95.8	95.6	106.1	104.2	104.4	1.683	0	24.0683	2
TOMM34	Q15785	Mitochondrial import receptor subunit TOM34 [OS=Homo sapiens]	0.907	0	49.1136	47.8964	13	26	13	1	309	34.538	8.98	High	High	High	High	High	High		95.1	104.9	4.25	3.85	90.5	98.1	96.7	109.5	101.9	103.3	3.642	0	80.0962	13
MAIP1	Q8WWC4	Uncharacterized protein C2orf47, mitochondrial [OS=Homo sapiens]	0.907	0.00228796	10.6335	11.3402	3	4	3	1	291	32.524	9.17	High	High	High	High	High	High		95.1	104.9	5.22	4.73	100.6	90.9	93.8	99.4	109.1	106.2	0.35	0	9.99508	3
SCO1	O75880	Protein SCO1 homolog, mitochondrial [OS=Homo sapiens]	0.906	0.00445001	5.6064	5.31561	2	3	2	1	301	33.793	8.88	High	High	High	High	High	High		95	105	2.23	2.01	93.9	97.5	93.7	106.1	102.5	106.3	0.334	0	7.50629	2
MAVS	Q7Z434	Mitochondrial antiviral-signaling protein [OS=Homo sapiens]	0.905	0	22.9013	16.6667	5	12	5	1	540	56.493	5.52	High	High	High	High	High	High		95	105	1.01	0.91	93.9	95.6	95.5	106.1	104.4	104.5	0.823	0	37.6889	5
NSUN2	Q08J23	tRNA (Cytosine(34)-C(5))-methyltransferase [OS=Homo sapiens]	0.905	0	103.045	38.2008	22	62	22	1	767	86.416	6.77	High	High	High	High	High	High		95	105	2.07	1.87	97.1	93.2	94.8	102.9	106.8	105.2	2.652	0	177.555	22
UQCRC1	P31930	Cytochrome b-c1 complex subunit 1, mitochondrial [OS=Homo sapiens]	0.903	0	68.2818	40	14	51	13	1	480	52.612	6.37	High	High	High	High	High	High		94.9	105.1	1.32	1.19	93.5	96	95.3	106.5	104	104.7	4.248	0	147.409	14
MTHFD1L	Q6UB35-1	Monofunctional C1-tetrahydrofolate synthase, mitochondrial [OS=Homo sapiens]	0.903	0	43.3653	11.8609	11	22	11	1	978	105.724	8.06	High	High	High	High	High	High		94.9	105.1	1.62	1.47	94.8	96.5	93.5	105.2	103.5	106.5	0.778	0	55.708	11
PDE12	Q6L8Q7-1	2',5'-phosphodiesterase 12 [OS=Homo sapiens]	0.901	0	16.887	9.68801	5	11	5	1	609	67.309	6.57	High	High	High	High	High	High		94.8	105.2	2.66	2.39	92	95.4	97	108	104.6	103	0.668	0	26.5352	5
MRPS27	Q92552-2	Isoform 2 of 28S ribosomal protein S27, mitochondrial [OS=Homo sapiens]	0.901	0	32.9431	19.8598	8	17	8	1	428	49.119	6.33	High	High	High	High	High	High		94.8	105.2	4.28	3.86	96.2	90.2	97.9	103.8	109.8	102.1	1.154	0	42.6648	8
TIMM23B	Q5SRD1	Putative mitochondrial import inner membrane translocase subunit Tim23B [OS=Homo sapiens]	0.899	0	14.3642	18.2879	3	7	3	1	257	28.03	9.39	High	High	High	High	High	High		94.7	105.3	0.3	0.27	94.7	94.4	95	105.3	105.6	105	0.701	0	24.7344	3
SLC25A12	O75746	Calcium-binding mitochondrial carrier protein Aralar1 [OS=Homo sapiens]	0.899	0	28.4725	13.2743	8	19	2	1	678	74.715	8.38	High	Not Found	High	High	Not Found	High		94.7	105.3	5.81	5.22	98.6		90.8	101.4		109.2	0.551	0	54.189	8
GLRX5	Q86SX6	Glutaredoxin-related protein 5, mitochondrial [OS=Homo sapiens]	0.898	0	20.3225	35.6688	5	13	5	1	157	16.618	6.79	High	High	High	High	High	High		94.6	105.4	3.26	2.92	96.9	95.9	91.1	103.1	104.1	108.9	3.642	0	37.4012	5
SQOR	Q9Y6N5	Sulfide:quinone oxidoreductase, mitochondrial [OS=Homo sapiens]	0.897	0	46.819	30.6667	11	22	11	1	450	49.929	9.11	High	High	High	High	High	High		94.6	105.4	5.06	4.54	96.3	98.3	89.2	103.7	101.7	110.8	1.254	0	67.9584	11
TMEM11	P17152	Transmembrane protein 11, mitochondrial [OS=Homo sapiens]	0.896	0.00467997	5.43885	9.89583	2	2	2	1	192	21.527	7.36	High	Not Found	High	High	Not Found	High		94.5	105.5	6.51	5.83	90.2		98.9	109.8		101.1	0.585	0	2.4655	2
CIAPIN1	Q6FI81-1	Anamorsin [OS=Homo sapiens]	0.896	0	23.504	29.8077	9	13	9	1	312	33.561	5.62	High	High	High	High	High	High		94.5	105.5	5.07	4.55	92.5	100	91.1	107.5	100	108.9	1.404	0	34.8806	9
DHX30	Q7L2E3-2	Isoform 2 of Putative ATP-dependent RNA helicase DHX30 [OS=Homo sapiens]	0.895	0.00228796	10.7375	3.92799	5	7	5	1	1222	136.03	8.6	High	High	High	High	High	High		94.4	105.6	1.12	1	94	95.7	93.7	106	104.3	106.3	0.147	0	12.2908	5
TIMM10	P62072	Mitochondrial import inner membrane translocase subunit Tim10 [OS=Homo sapiens]	0.894	0	12.3169	31.1111	3	10	3	1	90	10.326	6.29	High	High	High	High	High	High		94.4	105.6	1.22	1.09	93.8	93.7	95.8	106.2	106.3	104.2	2.162	0	25.5763	3
OAT	P04181-1	Ornithine aminotransferase, mitochondrial [OS=Homo sapiens]	0.894	0	39.8178	25.9681	10	33	10	1	439	48.504	7.03	High	High	High	High	High	High		94.4	105.6	1.69	1.51	95.2	92.6	95.5	104.8	107.4	104.5	2.3	0	67.5036	10
MRPL50	Q8N5N7	39S ribosomal protein L50, mitochondrial [OS=Homo sapiens]	0.892	0.00228796	10.4468	26.5823	3	4	3	1	158	18.313	7.88	Not Found	High	High	Not Found	High	High		94.3	105.7	2.89	2.58		92.4	96.2		107.6	103.8	0.874	0	11.3821	3
CHCHD3	Q9NX63	MICOS complex subunit MIC19 [OS=Homo sapiens]	0.892	0	39.6174	37.0044	10	25	10	1	227	26.136	8.28	High	High	High	High	High	High		94.3	105.7	1.82	1.62	92.4	95.6	95	107.6	104.4	105	4.275	0	71.9891	10
NDUFS8	O00217	NADH dehydrogenase [ubiquinone] iron-sulfur protein 8, mitochondrial [OS=Homo sapiens]	0.889	0.00354884	7.15811	14.2857	2	6	2	1	210	23.69	6.34	High	High	High	High	High	High		94.1	105.9	0.77	0.68	93.4	94.1	94.9	106.6	105.9	105.1	0.334	0	20.3538	2
MRPS17	Q9Y2R5	28S ribosomal protein S17, mitochondrial [OS=Homo sapiens]	0.889	0.00228796	9.02803	37.6923	3	4	3	1	130	14.493	9.85	High	High	High	High	High	High		94.1	105.9	0.87	0.77	94.7	93.5		105.3	106.5		1.683	0	7.48087	3
GFM1	Q96RP9-2	Isoform 2 of Elongation factor G, mitochondrial [OS=Homo sapiens]	0.888	0	26.2908	7.66234	5	17	5	1	770	85.815	7.18	High	High	High	High	High	High		94.1	105.9	1.29	1.15	95.1	94.4	92.7	104.9	105.6	107.3	0.38	0	40.4422	5
DDX3X	O00571	ATP-dependent RNA helicase DDX3X [OS=Homo sapiens]	0.887	0	164.306	53.3233	32	117	31	1	662	73.198	7.18	High	High	High	High	High	High		94	106	1.55	1.37	95.7	93.3	93.1	104.3	106.7	106.9	10.159	1	328.378	32
P4HA1	P13674-1	prolyl 4-hydroxylase subunit alpha-1 [OS=Homo sapiens]	0.887	0	19.4756	14.9813	7	10	7	1	534	61.011	6.01	High	High	High	High	High	High		94	106	6.2	5.5	91.9	100.6	89.6	108.1	99.4	110.4	0.607	0	22.9801	7
LACTB	P83111-1	Serine beta-lactamase-like protein LACTB, mitochondrial [OS=Homo sapiens]	0.886	0	14.7538	7.1298	4	11	4	1	547	60.655	8.53	High	High	High	High	High	High		94	106	5.27	4.67	93	89.6	99.3	107	110.4	100.7	0.403	0	27.7381	4
SDHB	P21912	Succinate dehydrogenase [ubiquinone] iron-sulfur subunit, mitochondrial [OS=Homo sapiens]	0.885	0	18.5986	23.2143	6	14	6	1	280	31.609	8.76	High	High	High	High	High	High		93.9	106.1	0.49	0.43	94.3	93.4	94.1	105.7	106.6	105.9	1.081	0	37.6419	6
MRPS30	Q9NP92	28S ribosomal protein S30, mitochondrial [OS=Homo sapiens]	0.885	0.00872509	4.46066	5.92255	2	2	2	1	439	50.333	7.97	High	High	Not Found	High	High	Not Found		93.9	106.1	8.05	7.13	99.3	88.6		100.7	111.4		0.245	0	0	2
KIFBP	Q96EK5	KIF1-binding protein [OS=Homo sapiens]	0.885	0	11.7701	7.56844	3	9	3	1	621	71.768	5.49	High	High	High	High	High	High		93.9	106.1	2.37	2.1	96.2	91.8	93.7	103.8	108.2	106.3	0.218	0	27.4228	3
NDUFA10	O95299	NADH dehydrogenase [ubiquinone] 1 alpha subcomplex subunit 10, mitochondrial [OS=Homo sapiens]	0.885	0	15.1694	14.0845	5	9	5	1	355	40.725	8.48	High	High	High	High	High	High		93.9	106.1	3.57	3.16	93.7	97.3	90.7	106.3	102.7	109.3	0.778	0	8.95471	5
PTGES2	Q9H7Z7	Prostaglandin E synthase 2 [OS=Homo sapiens]	0.884	0	15.0023	8.75332	4	11	4	1	377	41.917	9.16	High	High	High	High	High	High		93.8	106.2	5.63	4.98	89.3	99.7	92.6	110.7	100.3	107.4	0.557	0	29.7577	4
TST	Q16762	thiosulfate sulfurtransferase [OS=Homo sapiens]	0.883	0	25.6114	32.3232	6	13	6	1	297	33.408	7.25	High	High	High	High	High	High		93.8	106.2	3.43	3.03	94.5	96.6	90.3	105.5	103.4	109.7	0.995	0	37.0477	6
MYCBP	Q99417	C-Myc-binding protein [OS=Homo sapiens]	0.881	0	19.5301	37.8641	5	10	5	1	103	11.959	5.91	High	High	High	High	High	High		93.7	106.3	7.08	6.24	95.3	99.4	86.4	104.7	100.6	113.6	13.678	0	24.502	5
UCHL5	Q9Y5K5-1	Ubiquitin carboxyl-terminal hydrolase isozyme L5 [OS=Homo sapiens]	0.881	0	24.9188	20.9726	5	12	5	1	329	37.583	5.33	High	High	High	High	High	High		93.7	106.3	4.76	4.19	91.6	98.8	90.6	108.4	101.2	109.4	1.154	0	33.3197	5
ACADM	P11310-2	Isoform 2 of Medium-chain specific acyl-CoA dehydrogenase, mitochondrial [OS=Homo sapiens]	0.881	0	26.2004	18.3529	6	12	6	1	425	46.99	8.31	High	High	High	High	High	High		93.7	106.3	2.96	2.61	91.2	93.1	96.7	108.8	106.9	103.3	1.015	0	32.576	6
TSFM	P43897	Elongation factor Ts, mitochondrial [OS=Homo sapiens]	0.879	0	37.525	34.4615	9	18	9	1	325	35.368	8.38	High	High	High	High	High	High		93.5	106.5	8.31	7.3	84.7	96.6	99.3	115.3	103.4	100.7	2.548	0	48.0525	9
HCCS	P53701	Cytochrome c-type heme lyase [OS=Homo sapiens]	0.874	0	19.9223	21.2687	6	12	6	1	268	30.582	6.68	High	High	High	High	High	High		93.3	106.7	2.72	2.38	92.1	91.6	96.2	107.9	108.4	103.8	1.581	0	25.7966	6
SLIRP	Q9GZT3-1	SRA stem-loop-interacting RNA-binding protein, mitochondrial [OS=Homo sapiens]	0.873	0	21.9508	38.5321	5	13	5	1	109	12.341	10.24	High	High	High	High	High	High		93.2	106.8	5.04	4.4	89.2	92.1	98.4	110.8	107.9	101.6	3.329	0	27.9362	5
PTCD3	Q96EY7-1	pentatricopeptide repeat domain-containing protein 3, mitochondrial [OS=Homo sapiens]	0.873	0	11.9707	10.3048	5	8	4	1	689	78.5	6.42	High	High	High	High	High	High		93.2	106.8	9.32	8.14	102.5	85.2	92	97.5	114.8	108	0.292	0	15.5196	5
MRPS26	Q9BYN8	28S ribosomal protein S26, mitochondrial [OS=Homo sapiens]	0.872	0.00445001	6.00246	9.7561	2	4	2	1	205	24.197	10.39	Not Found	High	High	Not Found	High	High		93.1	106.9	0.17	0.15		93	93.3		107	106.7	0.359	0	6.0818	2
MRPS34	P82930	28S ribosomal protein S34, mitochondrial [OS=Homo sapiens]	0.87	0.00431099	6.48785	11.0092	3	6	3	1	218	25.634	9.98	High	High	High	High	High	High		93	107	3.22	2.8	95.8	93.5	89.9	104.2	106.5	110.1	0.585	0	11.8677	3
DYNLL1	P63167	Dynein light chain 1, cytoplasmic [OS=Homo sapiens]	0.87	0	22.3178	44.9438	3	15	2	1	89	10.359	7.4	High	High	High	High	High	High		93	107	1.84	1.6	91.6	94.9	92.6	108.4	105.1	107.4	14.849	1	51.306	3
AKAP8	O43823	A-kinase anchor protein 8 [OS=Homo sapiens]	0.87	0	20.8806	8.81503	5	10	5	1	692	76.061	5.15	High	High	High	High	High	High		93	107	4.1	3.57	93.2	96.8	89.1	106.8	103.2	110.9	0.45	0	34.2742	5
MTHFD2	P13995	Bifunctional methylenetetrahydrofolate dehydrogenase/cyclohydrolase, mitochondrial [OS=Homo sapiens]	0.869	0	19.2182	20.8571	5	13	5	1	350	37.871	8.73	High	High	High	High	High	High		93	107	1.7	1.48	94.6	92.9	91.5	105.4	107.1	108.5	0.688	0	38.4158	5
NDUFB6	O95139	NADH dehydrogenase [ubiquinone] 1 beta subcomplex subunit 6 [OS=Homo sapiens]	0.868	0.00602087	4.98874	19.5312	2	7	2	1	128	15.479	9.63	High	High	High	High	High	High		92.9	107.1	2.75	2.38	92.4	95.7	90.7	107.6	104.3	109.3	0.668	0	22.532	2
LYRM7	Q5U5X0	Complex III assembly factor LYRM7 [OS=Homo sapiens]	0.867	0.00228796	8.20372	25.9615	2	5	2	1	104	11.947	9.66	High	High	High	High	High	High		92.9	107.1	3.23	2.8	95	90.8		105	109.2		0.778	0	13.9952	2
MRPL53	Q96EL3	39S ribosomal protein L53, mitochondrial [OS=Homo sapiens]	0.866	0.00228796	11.4038	22.3214	2	8	2	1	112	12.099	8.76	High	High	High	High	High	High		92.8	107.2	2.06	1.79	90.9	92.7	94.7	109.1	107.3	105.3	1.154	0	20.3001	2
TRMT10C	Q7L0Y3	Mitochondrial ribonuclease P protein 1 [OS=Homo sapiens]	0.866	0	65.5389	51.861	17	41	17	1	403	47.317	9.36	High	High	High	High	High	High		92.8	107.2	2.15	1.86	95.1	92	91.4	104.9	108	108.6	3.52	0	115.568	17
TOMM7	Q9P0U1	Mitochondrial import receptor subunit TOM7 homolog [OS=Homo sapiens]	0.862	0.00836098	4.5447	23.6364	2	7	2	1	55	6.244	10.29	High	High	High	High	High	High		92.6	107.4	2.68	2.31	91.9	95.4	90.6	108.1	104.6	109.4	4.623	0	7.07198	2
DIABLO	Q9NR28-1	Diablo homolog, mitochondrial [OS=Homo sapiens]	0.861	0	19.5762	33.0544	6	8	5	1	239	27.114	5.9	High	High	High	High	High	High		92.5	107.5	5.99	5.16	96.4	95	86.2	103.6	105	113.8	1.254	0	21.8858	6
FAM162A	Q96A26	Protein FAM162A [OS=Homo sapiens]	0.859	0	16.152	23.3766	3	14	3	1	154	17.331	9.77	High	High	High	High	High	High		92.4	107.6	1.7	1.46	90.8	92.4	94	109.2	107.6	106	2.162	0	37.1017	3
TBRG4	Q969Z0-1	Protein TBRG4 [OS=Homo sapiens]	0.859	0	15.0233	7.13154	5	9	5	1	631	70.693	7.42	High	High	High	High	High	High		92.4	107.6	4.03	3.46	96.6	90.8	89.7	103.4	109.2	110.3	0.354	0	26.2215	5
CYCS	P99999	cytochrome c [OS=Homo sapiens]	0.855	0	38.7899	61.9048	7	31	7	1	105	11.741	9.57	High	High	High	High	High	High		92.2	107.8	0.47	0.41	92.7	91.8	92	107.3	108.2	108	22.714	0	86.7069	7
MRPL1	Q9BYD6	39S ribosomal protein L1, mitochondrial [OS=Homo sapiens]	0.853	0	35.6257	33.8462	9	21	9	1	325	36.885	8.78	High	High	High	High	High	High		92.1	107.9	2.13	1.82	93.9	92.2	90	106.1	107.8	110	2.34	0	45.8725	9
TIMM50	Q3ZCQ8-2	Isoform 2 of Mitochondrial import inner membrane translocase subunit TIM50 [OS=Homo sapiens]	0.853	0	24.3613	18.4211	7	13	7	1	456	50.433	9.42	High	High	High	High	High	High		92.1	107.9	1.85	1.58	93.9	91.8	90.5	106.1	108.2	109.5	0.905	0	39.9434	7
UQCRB	P14927	Cytochrome b-c1 complex subunit 7 [OS=Homo sapiens]	0.849	0	28.5969	49.5495	6	18	6	1	111	13.522	8.78	High	High	High	High	High	High		91.8	108.2	2.33	1.98	90	91.2	94.2	110	108.8	105.8	9	0	48.4129	6
SQSTM1	Q13501-1	sequestosome-1 [OS=Homo sapiens]	0.849	0	20.0342	26.5909	6	9	6	1	440	47.657	5.22	High	High	High	High	High	High		91.9	108.1	7.47	6.34	98.9	85.2	91.5	101.1	114.8	108.5	1.069	0	22.0469	6
POLDIP2	Q9Y2S7	Polymerase delta-interacting protein 2 [OS=Homo sapiens]	0.847	0.00445001	5.99661	4.61957	2	4	2	1	368	42.007	8.63	High	High	High	High	High	High		91.7	108.3	2.34	1.98	93.2	90.2		106.8	109.8		0.292	0	6.2776	2
MRPL44	Q9H9J2	39S ribosomal protein L44, mitochondrial [OS=Homo sapiens]	0.846	0.00228796	11.5429	13.253	4	8	4	1	332	37.512	8.4	High	High	High	High	High	High		91.6	108.4	2.02	1.71	92.9	89.5	92.5	107.1	110.5	107.5	0.52	0	16.2042	4
NDUFS5	O43920	NADH dehydrogenase [ubiquinone] iron-sulfur protein 5 [OS=Homo sapiens]	0.841	0.00487211	5.34936	23.5849	2	4	2	1	106	12.509	9.14	High	High	High	High	High	High		91.4	108.6	8.55	7.19	85.8		96.9	114.2		103.1	0.931	0	4.52254	2
NDUFS3	O75489	NADH dehydrogenase [ubiquinone] iron-sulfur protein 3, mitochondrial [OS=Homo sapiens]	0.84	0	20.0211	28.4091	6	13	6	1	264	30.223	7.5	High	High	High	High	High	High		91.3	108.7	2.95	2.48	88.7	91.2	94.1	111.3	108.8	105.9	0.995	0	34.0774	6
MRPL11	Q9Y3B7-1	39S ribosomal protein L11, mitochondrial [OS=Homo sapiens]	0.84	0	26.6279	44.7917	8	14	8	1	192	20.67	9.91	High	High	High	High	High	High		91.3	108.7	2.34	1.96	88.9	93	92	111.1	107	108	3.394	0	33.8637	8
CHCHD4	Q8N4Q1-2	Isoform 2 of Mitochondrial intermembrane space import and assembly protein 40 [OS=Homo sapiens]	0.837	0	15.6098	41.9355	5	7	5	1	155	17.374	4.39	High	High	Not Found	High	High	Not Found		91.1	108.9	5.8	4.86	87.4	94.9		112.6	105.1		2.594	0	21.5216	5
MRPS16	Q9Y3D3	28S ribosomal protein S16, mitochondrial [OS=Homo sapiens]	0.832	0	13.4236	28.4672	3	10	3	1	137	15.335	9.5	High	High	High	High	High	High		90.8	109.2	3.02	2.51	92.1	92.6	87.6	107.9	107.4	112.4	1.512	0	28.2963	3
IVD	P26440	Isovaleryl-CoA dehydrogenase, mitochondrial [OS=Homo sapiens]	0.824	0	23.4151	14.6572	6	12	6	1	423	46.29	8.19	High	High	High	High	High	High		90.3	109.7	8.27	6.81	93	81.9	96.1	107	118.1	103.9	1.031	0	34.0694	6
MRPL58	Q14197	Peptidyl-tRNA hydrolase ICT1, mitochondrial [OS=Homo sapiens]	0.822	0	12.6712	17.4757	3	9	3	1	206	23.615	10.07	High	High	High	High	High	High		90.2	109.8	2.64	2.17	92.5	87.7	90.4	107.5	112.3	109.6	0.848	0	17.881	3
MRPL22	Q9NWU5	39S ribosomal protein L22, mitochondrial [OS=Homo sapiens]	0.819	0	17.5944	22.8155	4	7	4	1	206	23.626	9.94	High	High	High	High	High	High		90	110	7.11	5.82		85.5	94.5		114.5	105.5	1.154	0	16.0823	4
STOM	P27105	erythrocyte band 7 integral membrane protein [OS=Homo sapiens]	0.817	0	16.4003	21.5278	5	9	5	1	288	31.711	7.88	High	High	High	High	High	High		89.9	110.1	3.3	2.69	88.9	93.2	87.5	111.1	106.8	112.5	0.896	0	24.7893	5
MRPS5	P82675	28S ribosomal protein S5, mitochondrial [OS=Homo sapiens]	0.813	0	18.3079	15.5814	6	11	6	1	430	47.976	9.92	High	High	High	High	High	High		89.7	110.3	7.32	5.95	82.3	92	94.8	117.7	108	105.2	0.668	0	21.4267	6
CDK1	P06493	Cyclin-dependent kinase 1 [OS=Homo sapiens]	0.812	0	55.2913	54.5455	14	39	12	1	297	34.074	8.4	High	High	High	High	High	High		89.6	110.4	0.84	0.68	89.4	89	90.5	110.6	111	109.5	4.78	2	113.81	14
ALDH4A1	P30038	Delta-1-pyrroline-5-carboxylate dehydrogenase, mitochondrial [OS=Homo sapiens]	0.808	0	28.0733	13.3215	7	16	7	1	563	61.681	8.07	High	High	High	High	High	High		89.4	110.6	4.69	3.79	84.6	92.3	91.3	115.4	107.7	108.7	0.863	0	41.0969	7
NFU1	Q9UMS0	NFU1 iron-sulfur cluster scaffold homolog, mitochondrial [OS=Homo sapiens]	0.808	0	11.8841	14.9606	3	5	3	1	254	28.444	5.07	High	High	High	High	High	High		89.4	110.6	1.21	0.98	90.5	88.4	89.2	109.5	111.6	110.8	0.638	0	15.5891	3
NDUFV1	P49821	NADH dehydrogenase [ubiquinone] flavoprotein 1, mitochondrial [OS=Homo sapiens]	0.807	0.00445001	6.02699	3.87931	2	4	2	1	464	50.785	8.21	High	High	High	High	High	High		89.3	110.7	4.67	3.77	92.3		86.4	107.7		113.6	0.186	0	9.53473	2
MRPS23	Q9Y3D9	28S ribosomal protein S23, mitochondrial [OS=Homo sapiens]	0.806	0	19.841	29.4737	5	13	5	1	190	21.757	8.9	High	High	High	High	High	High		89.3	110.7	6.26	5.05	95.4	84.5	87.8	104.6	115.5	112.2	1.894	0	31.3132	5
NDUFA5	Q16718	NADH dehydrogenase [ubiquinone] 1 alpha subcomplex subunit 5 [OS=Homo sapiens]	0.801	0	15.6993	43.1034	4	10	4	1	116	13.45	5.99	High	High	High	High	High	High		88.9	111.1	2.78	2.23	91.7	88.3	86.8	108.3	111.7	113.2	2.728	0	27.283	4
COX6C	P09669	Cytochrome c oxidase subunit 6C [OS=Homo sapiens]	0.798	0	12.8319	28	3	10	3	1	75	8.776	10.39	High	High	High	High	High	High		88.8	111.2	0.55	0.44	88.4	88.5	89.3	111.6	111.5	110.7	3.642	0	19.7362	3
BAX	Q07812-2	Isoform Beta of Apoptosis regulator BAX [OS=Homo sapiens]	0.798	0	25.8437	28.8991	5	15	5	1	218	24.204	7.9	High	High	High	High	High	High		88.8	111.2	7.5	5.98	88	95.8	82.6	112	104.2	117.4	1.371	0	47.0034	5
OGDH	Q02218	2-oxoglutarate dehydrogenase, mitochondrial [OS=Homo sapiens]	0.797	0	50.0196	16.3245	14	26	14	1	1023	115.861	6.86	High	High	High	High	High	High		88.7	111.3	1.13	0.9	89.8	87.8	88.5	110.2	112.2	111.5	0.817	0	65.9087	14
DAP3	P51398-1	28S ribosomal protein S29, mitochondrial [OS=Homo sapiens]	0.796	0	26.8032	20.8543	7	13	7	1	398	45.538	8.88	High	High	High	High	High	High		88.7	111.3	2.3	1.83	86.3	89.6	90	113.7	110.4	110	1.371	0	24.7072	7
MRPS9	P82933	28S ribosomal protein S9, mitochondrial [OS=Homo sapiens]	0.791	0.00228796	10.1577	9.84848	3	5	3	1	396	45.806	9.51	High	High	High	High	High	High		88.3	111.7	6.41	5.07	94.6	83.6	86.9	105.4	116.4	113.1	0.269	0	13.1685	3
ATP5ME	P56385	ATP synthase subunit e, mitochondrial [OS=Homo sapiens]	0.787	0	13.2113	42.029	3	8	3	1	69	7.928	9.35	High	High	High	High	High	High		88.1	111.9	1.18	0.93	86.9	88.8	88.5	113.1	111.2	111.5	5.31	0	20.1036	3
TIMM13	Q9Y5L4	mitochondrial import inner membrane translocase subunit TIM13 [OS=Homo sapiens]	0.784	0	15.973	42.1053	3	10	3	1	95	10.493	8.18	High	High	High	High	High	High		87.9	112.1	5.86	4.59	82.4	88.5	92.7	117.6	111.5	107.3	3.642	0	33.0392	3
MRPS22	P82650	28S ribosomal protein S22, mitochondrial [OS=Homo sapiens]	0.783	0	23.3091	15.2778	6	14	6	1	360	41.254	7.9	High	High	High	High	High	High		87.8	112.2	1	0.78	87.5	88.8	87.2	112.5	111.2	112.8	0.905	0	40.3676	6
PYCR2	Q96C36	Pyrroline-5-carboxylate reductase 2 [OS=Homo sapiens]	0.781	0	16.3582	12.5	3	12	2	1	320	33.616	7.77	High	High	High	High	High	High		87.7	112.3	3.8	2.97	87	91.4	84.9	113	108.6	115.1	0.848	0	28.5671	3
COX5A	P20674	Cytochrome c oxidase subunit 5A, mitochondrial [OS=Homo sapiens]	0.776	0	28.0894	44.6667	5	39	4	1	150	16.752	6.79	High	High	High	High	High	High		87.4	112.6	1.68	1.31	86	88.9	87.2	114	111.1	112.8	4.337	0	101.228	5
COA6	Q5JTJ3-2	Isoform 2 of Cytochrome c oxidase assembly factor 6 homolog [OS=Homo sapiens]	0.771	0	14.769	25.641	3	9	3	1	156	18.082	10.1	High	High	High	High	High	High		87.1	112.9	0.11	0.08	87		87.1	113		112.9	2.162	0	28.3812	3
MRPL3	P09001	39S ribosomal protein L3, mitochondrial [OS=Homo sapiens]	0.766	0.00445001	5.96307	14.9425	3	4	3	1	348	38.608	9.48	High	High	High	High	High	High		86.8	113.2	5.55	4.26		83.4	90.2		116.6	109.8	0.35	0	7.6874	3
GLS	O94925-1	Glutaminase kidney isoform, mitochondrial [OS=Homo sapiens]	0.761	0.00445001	5.63396	2.84006	2	4	2	1	669	73.414	7.77	High	High	High	High	High	High		86.4	113.6	7.23	5.5	90	90.1	79.2	110	109.9	120.8	0.116	0	9.94704	2
MRPL45	Q9BRJ2	39S ribosomal protein L45, mitochondrial [OS=Homo sapiens]	0.759	0.00445001	5.93145	15.3595	3	3	3	1	306	35.328	9.03	High	Not Found	High	High	Not Found	High		86.3	113.7	10.17	7.72	92.5		80.1	107.5		119.9	0.389	0	3.95041	3
MRPL17	Q9NRX2	39S ribosomal protein L17, mitochondrial [OS=Homo sapiens]	0.759	0.00487211	5.35694	14.2857	3	3	3	1	175	20.038	10.11	High	Not Found	High	High	Not Found	High		86.3	113.7	0.85	0.65	85.8		86.8	114.2		113.2	0.638	0	3.52788	3
NDUFS2	O75306-1	NADH dehydrogenase [ubiquinone] iron-sulfur protein 2, mitochondrial [OS=Homo sapiens]	0.758	0	24.4992	14.6868	6	19	6	1	463	52.512	7.55	High	High	High	High	High	High		86.3	113.7	1.23	0.93	87	86.8	85	113	113.2	115	0.978	0	50.0249	6
MRPL15	Q9P015	39S ribosomal protein L15, mitochondrial [OS=Homo sapiens]	0.756	0.00228796	9.02578	10.1351	3	5	3	1	296	33.399	10.01	High	High	High	High	High	High		86.1	113.9	4.67	3.53	83.6	90.8	84	116.4	109.2	116	0.438	0	11.7915	3
MRPL9	Q9BYD2	39S ribosomal protein L9, mitochondrial [OS=Homo sapiens]	0.755	0.00228796	11.3273	17.2285	4	8	4	1	267	30.224	10.08	High	High	High	High	High	High		86.1	113.9	4.59	3.47	84.1	83.5	90.6	115.9	116.5	109.4	0.624	0	17.3599	4
HK2	P52789	Hexokinase-2 [OS=Homo sapiens]	0.753	0	66.0172	20.2835	17	47	13	1	917	102.313	6.05	High	High	High	High	High	High		85.9	114.1	1.46	1.1	86.7	84.4	86.5	113.3	115.6	113.5	1.384	0	121.07	17
OXA1L	Q15070-1	Mitochondrial inner membrane protein OXA1L [OS=Homo sapiens]	0.75	0	14.4957	11.0345	5	8	5	1	435	48.516	9.45	High	High	High	High	High	High		85.7	114.3	13.88	10.41	87.1	73.2	96.9	112.9	126.8	103.1	0.968	0	18.2544	5
NDUFC2	O95298-1	NADH dehydrogenase [ubiquinone] 1 subunit C2 [OS=Homo sapiens]	0.749	0.00445001	5.69365	12.605	2	4	2	1	119	14.178	8.98	High	High	High	High	High	High		85.6	114.4	0.59	0.44	85.2	86.2	85.6	114.8	113.8	114.4	0.585	0	10.6674	2
MRPS15	P82914	28S ribosomal protein S15, mitochondrial [OS=Homo sapiens]	0.748	0.00445001	5.95696	9.72763	3	4	3	1	257	29.823	10.48	High	High	High	High	High	High		85.6	114.4	9.34	6.98	83.1	79.1	94.5	116.9	120.9	105.5	0.438	0	6.318	3
ATP5F1C	P36542-1	ATP synthase subunit gamma, mitochondrial [OS=Homo sapiens]	0.748	0	62.4845	37.9195	11	47	11	1	298	32.975	9.22	High	High	High	High	High	High		85.6	114.4	0.87	0.65	84.8	86.1	86	115.2	113.9	114	9	0	139.746	11
MRPL47	Q9HD33-1	39S ribosomal protein L47, mitochondrial [OS=Homo sapiens]	0.744	0.00431099	6.48245	8.4	2	5	2	1	250	29.432	10.37	High	High	High	High	High	High		85.3	114.7	4.13	3.07	82.8		87.8	117.2		112.2	0.292	0	7.25619	2
MRPL19	P49406	39S ribosomal protein L19, mitochondrial [OS=Homo sapiens]	0.739	0.00228796	9.39347	14.3836	3	4	3	1	292	33.514	9.5	High	High	High	High	High	High		85	115	4.71	3.48	88.8	80.8	85.4	111.2	119.2	114.6	0.35	0	7.22975	3
CLPX	O76031	ATP-dependent Clp protease ATP-binding subunit clpX-like, mitochondrial [OS=Homo sapiens]	0.739	0	47.9627	21.8009	12	20	12	1	633	69.181	7.58	High	High	High	High	High	High		85	115	3.5	2.58	88	82	84.9	112	118	115.1	1.081	0	48.7917	12
GRSF1	Q12849	G-rich sequence factor 1 [OS=Homo sapiens]	0.738	0	18.9483	11.875	5	10	5	1	480	53.093	6.19	High	High	High	High	High	High		84.9	115.1	4.18	3.09	86.8	80.8	87.2	113.2	119.2	112.8	0.562	0	26.4991	5
SH3GLB1	Q9Y371-2	Isoform 2 of Endophilin-B1 [OS=Homo sapiens]	0.736	0.00445001	5.82397	5.95855	2	4	2	1	386	43.169	5.68	High	High	High	High	High	High		84.8	115.2	4.01	2.95	88.4	81.7	84.3	111.6	118.3	115.7	0.222	0	9.50206	2
MRPS18B	Q9Y676	28S ribosomal protein S18b, mitochondrial [OS=Homo sapiens]	0.735	0	17.305	26.3566	5	8	5	1	258	29.377	9.38	High	High	High	High	High	High		84.7	115.3	8.22	6.04	90.5	77	86.8	109.5	123	113.2	1.154	0	19.6597	5
UQCRH	P07919	Cytochrome b-c1 complex subunit 6, mitochondrial [OS=Homo sapiens]	0.735	0	19.0511	72.5275	5	13	5	1	91	10.732	4.44	High	High	High	High	High	High		84.7	115.3	3.8	2.79	85.5	81.1	87.4	114.5	118.9	112.6	6.197	0	37.0847	5
MRPS7	Q9Y2R9	28S ribosomal protein S7, mitochondrial [OS=Homo sapiens]	0.732	0.00228796	8.7013	9.91736	2	3	2	1	242	28.116	9.99	High	Not Found	High	High	Not Found	High		84.5	115.5	6.3	4.61	80.8		88.3	119.2		111.7	0.274	0	11.2432	2
COA7	Q96BR5	Cytochrome c oxidase assembly factor 7 [OS=Homo sapiens]	0.732	0.0038373	6.91835	12.1212	3	4	3	1	231	25.692	6.02	High	Not Found	High	High	Not Found	High		84.5	115.5	1.87	1.37	85.6		83.4	114.4		116.6	0.54	0	8.51238	3
NDUFA8	P51970	NADH dehydrogenase [ubiquinone] 1 alpha subcomplex subunit 8 [OS=Homo sapiens]	0.726	0.00445001	6.02777	12.2093	2	3	2	1	172	20.092	7.65	High	Not Found	High	High	Not Found	High		84.2	115.8	0.99	0.72	83.6		84.7	116.4		115.3	0.52	0	8.45881	2
TYMS	P04818	thymidylate synthase [OS=Homo sapiens]	0.72	0	43.2344	23.3227	6	25	6	1	313	35.693	7.01	High	High	High	High	High	High		83.7	116.3	0.85	0.61	83.8	83	84.4	116.2	117	115.6	3.084	0	63.9723	6
GBF1	Q92538	Golgi-specific brefeldin A-resistance guanine nucleotide exchange factor 1 [OS=Homo sapiens]	0.716	0.00228796	10.9244	2.52824	4	15	3	1	1859	206.315	5.73	High	High	High	High	High	High		83.4	116.6	3.04	2.18	85.2	81.7		114.8	118.3		0.087	0	35.2321	4
MRPL37	Q9BZE1	39S ribosomal protein L37, mitochondrial [OS=Homo sapiens]	0.716	0.00228796	10.9925	12.2931	4	7	4	1	423	48.087	8.59	High	High	High	High	High	High		83.4	116.6	11.55	8.27	88.6	72.3	89.4	111.4	127.7	110.6	0.334	0	15.5341	4
NDUFB10	O96000	NADH dehydrogenase [ubiquinone] 1 beta subcomplex subunit 10 [OS=Homo sapiens]	0.708	0	15.5275	20.3488	3	13	3	1	172	20.763	8.48	High	High	High	High	High	High		82.9	117.1	5.36	3.8	79	87.7	82.1	121	112.3	117.9	1.154	0	33.2055	3
TRMT5	Q32P41	tRNA (guanine(37)-N1)-methyltransferase [OS=Homo sapiens]	0.708	0.00602087	4.86832	3.73281	2	4	2	1	509	58.209	8.62	High	High	High	High	High	High		82.9	117.1	12.88	9.13	90.8	70.8	87.2	109.2	129.2	112.8	0.125	0	9.70391	2
MRPL39	Q9NYK5-2	Isoform 2 of 39S ribosomal protein L39, mitochondrial [OS=Homo sapiens]	0.705	0	12.349	9.63173	3	9	3	1	353	40.432	7.91	High	High	High	High	High	High		82.7	117.3	3.99	2.81	81	80.5	86.5	119	119.5	113.5	0.492	0	20.9964	3
TIMM8B	Q9Y5J9	mitochondrial import inner membrane translocase subunit Tim8 B [OS=Homo sapiens]	0.704	0.00228796	8.41174	22.8916	2	5	2	1	83	9.338	5.12	High	High	High	High	High	High		82.6	117.4	5.86	4.12	88.1	78.8	80.9	111.9	121.2	119.1	0.931	0	16.9705	2
NDUFV2	P19404	NADH dehydrogenase [ubiquinone] flavoprotein 2, mitochondrial [OS=Homo sapiens]	0.698	0	14.6684	16.8675	3	8	3	1	249	27.374	8.06	High	High	High	High	High	High		82.2	117.8	4	2.8	83.3	78.5	84.9	116.7	121.5	115.1	0.668	0	17.9303	3
CCNB1	P14635	G2/mitotic-specific cyclin-B1 [OS=Homo sapiens]	0.696	0.00467997	5.47786	5.08083	2	3	2	1	433	48.306	7.47	Not Found	High	High	Not Found	High	High		82.1	117.9	0.44	0.31		81.8	82.3		118.2	117.7	0.233	0	5.91611	2
CWC15	Q9P013	spliceosome-associated protein CWC15 homolog [OS=Homo sapiens]	0.688	0.00228796	9.17042	20.524	3	5	3	1	229	26.608	5.71	High	High	High	High	High	High		81.5	118.5	1.72	1.19	79.9	82.4	82.2	120.1	117.6	117.8	0.874	0	14.4885	3
COX6B1	P14854	Cytochrome c oxidase subunit 6B1 [OS=Homo sapiens]	0.687	0	23.1184	53.4884	4	27	4	1	86	10.186	7.05	High	High	High	High	High	High		81.5	118.5	4.31	2.96	83.6	77.4	83.4	116.4	122.6	116.6	9	0	82.3223	4
GHITM	Q9H3K2	Growth hormone-inducible transmembrane protein [OS=Homo sapiens]	0.685	0	12.6782	8.69565	3	9	3	1	345	37.181	9.94	High	High	High	High	High	High		81.3	118.7	3.19	2.19	79.4	84.3	80.3	120.6	115.7	119.7	0.719	0	24.3251	3
NDUFB5	O43674-1	NADH dehydrogenase [ubiquinone] 1 beta subcomplex subunit 5, mitochondrial [OS=Homo sapiens]	0.684	0.00872509	4.47617	8.46561	2	6	2	1	189	21.737	9.63	High	High	High	High	High	High		81.2	118.8	4.2	2.87	78.6	85.1	80	121.4	114.9	120	0.52	0	9.46104	2
ATP5F1D	P30049	ATP synthase subunit delta, mitochondrial [OS=Homo sapiens]	0.677	0	11.9373	13.6905	2	9	2	1	168	17.479	5.49	High	High	High	High	High	High		80.7	119.3	0.65	0.44	81.3	80.3	80.6	118.7	119.7	119.4	1.371	0	31.2057	2
ATP5F1E	P56381	ATP synthase subunit epsilon, mitochondrial [OS=Homo sapiens]	0.661	0.00228796	9.0535	43.1373	3	8	3	1	51	5.776	9.92	High	High	High	High	High	High		79.6	120.4	1.35	0.89	78.4	80	80.3	121.6	120	119.7	16.783	0	21.8012	3
PNKD	Q8N490-2	Isoform 2 of Probable hydrolase PNKD [OS=Homo sapiens]	0.657	0.00445001	5.96946	19.7183	2	3	2	1	142	15.387	10.58	High	High	Not Found	High	High	Not Found		79.3	120.7	20.48	13.46	67.8	90.8		132.2	109.2		0.931	0	8.42604	2
COX4I1	P13073	Cytochrome c oxidase subunit 4 isoform 1, mitochondrial [OS=Homo sapiens]	0.654	0	45.7644	39.0533	7	46	7	1	169	19.564	9.51	High	High	High	High	High	High		79	121	0.84	0.55	79.7	78.4	79	120.3	121.6	121	11.115	0	139.228	7
HCLS1	P14317	Hematopoietic lineage cell-specific protein [OS=Homo sapiens]	0.65	0	41.2897	24.8971	11	23	11	1	486	53.981	4.81	High	High	High	High	High	High		78.8	121.2	1.84	1.2	79.6	79.7	77.1	120.4	120.3	122.9	2.728	0	67.5883	11
NDUFS1	P28331-2	Isoform 2 of NADH-ubiquinone oxidoreductase 75 kDa subunit, mitochondrial [OS=Homo sapiens]	0.649	0	37.417	18.3536	11	17	11	1	741	80.945	6.64	High	High	High	High	High	High		78.7	121.3	7	4.55	73.1	78.9	84.1	126.9	121.1	115.9	0.668	0	42.8631	11
NDUFA13	Q9P0J0-2	Isoform 2 of NADH dehydrogenase [ubiquinone] 1 alpha subcomplex subunit 13 [OS=Homo sapiens]	0.641	0.00228796	11.4316	10.8108	2	7	2	1	222	24.866	9.7	High	High	High	High	High	High		78.1	121.9	13	8.33	66.5	85.5	82.3	133.5	114.5	117.7	0.701	0	18.6875	2
NDUFS6	O75380	NADH dehydrogenase [ubiquinone] iron-sulfur protein 6, mitochondrial [OS=Homo sapiens]	0.61	0.00353243	7.8668	17.7419	2	5	2	1	124	13.703	8.28	High	High	High	High	High	High		75.8	124.2	4.61	2.81	79.5	72.6	75.1	120.5	127.4	124.9	0.668	0	17.5666	2
DHFR	P00374	dihydrofolate reductase [OS=Homo sapiens]	0.588	0	23.393	36.8984	7	15	7	1	187	21.439	7.42	High	High	High	High	High	High		74.1	125.9	9.56	5.62	70.5	82.2	69.4	129.5	117.8	130.6	2.728	0	40.7619	7
NDUFA4	O00483	Cytochrome c oxidase subunit NDUFA4 [OS=Homo sapiens]	0.567	0	14.488	55.5556	5	14	5	1	81	9.364	9.38	High	High	High	High	High	High		72.4	127.6	1.76	1	72.6	71	73.5	127.4	129	126.5	9	0	36.6656	5
NDUFB11	Q9NX14-2	Isoform 2 of NADH dehydrogenase [ubiquinone] 1 beta subcomplex subunit 11, mitochondrial [OS=Homo sapiens]	0.515	0	12.5157	20.8589	2	7	2	1	163	18.352	5.24	High	High	High	High	High	High		68	132	12.7	6.53	66.3	77.3	60.3	133.7	122.7	139.7	0.701	0	21.7028	2
NRGN	Q92686	Neurogranin [OS=Homo sapiens]	0.509	0.00445001	5.96854	32.0513	2	3	2	1	78	7.614	7.87	High	Not Found	High	High	Not Found	High		67.4	132.6	1.08	0.55	66.9		67.9	133.1		132.1	2.162	0	6.91798	2
NDUFA2	O43678	NADH dehydrogenase [ubiquinone] 1 alpha subcomplex subunit 2 [OS=Homo sapiens]	0.463	0	11.9547	38.3838	3	8	3	1	99	10.915	9.57	High	High	High	High	High	High		63.3	136.7	23.71	10.97	46.1	69.6	74	153.9	130.4	126	1.683	0	24.108	3
